# Supplementary figures and images for: Characterization of proteins in S. cerevisiae with subcellular localizations
Source: Royal Society of Chemistry journal article supplement (doi:10.1039/c5mb00124b), 2015-03-13

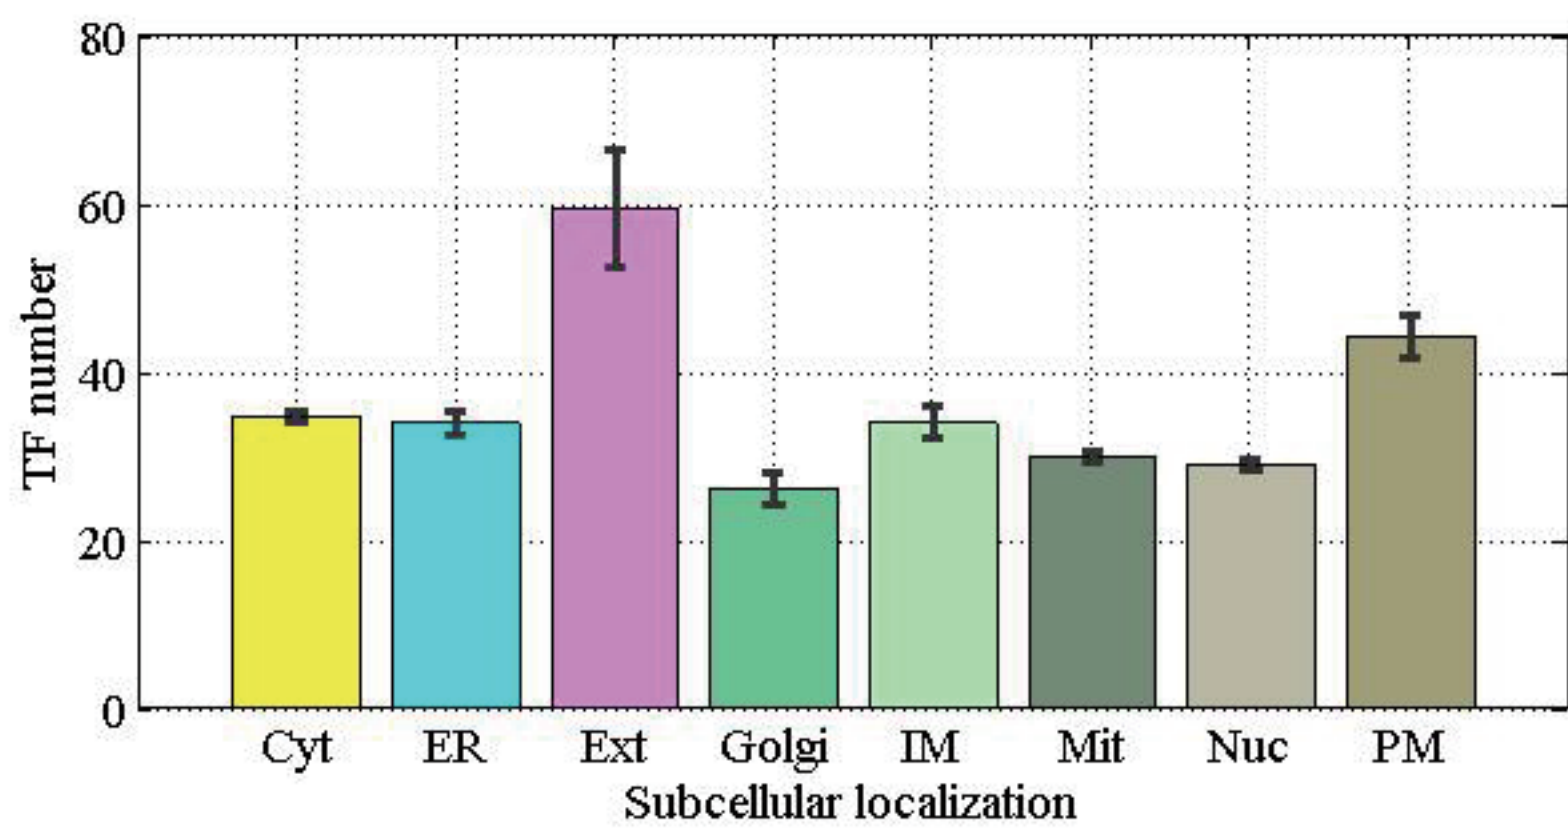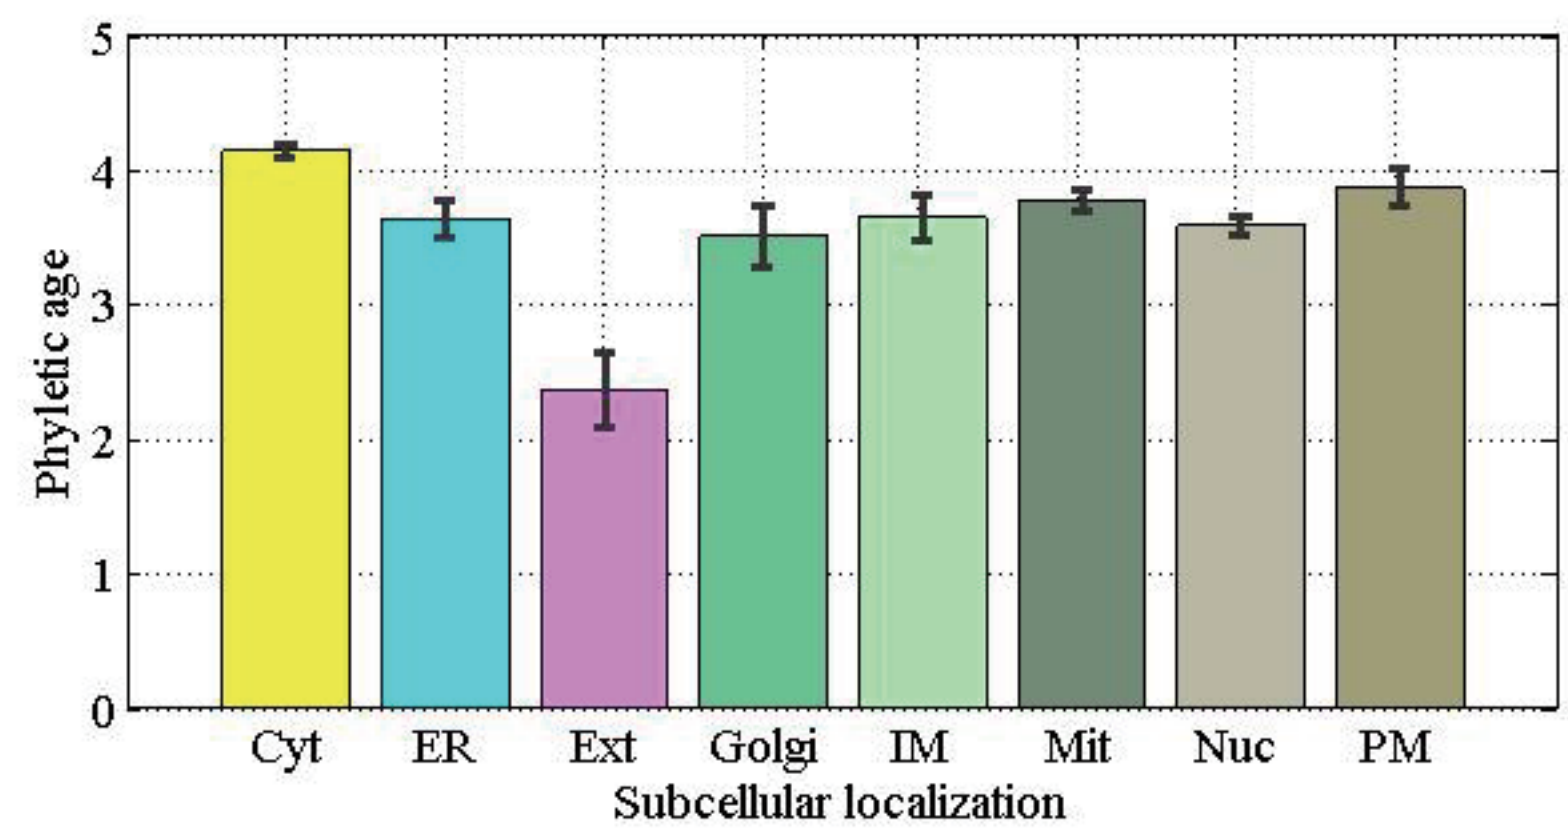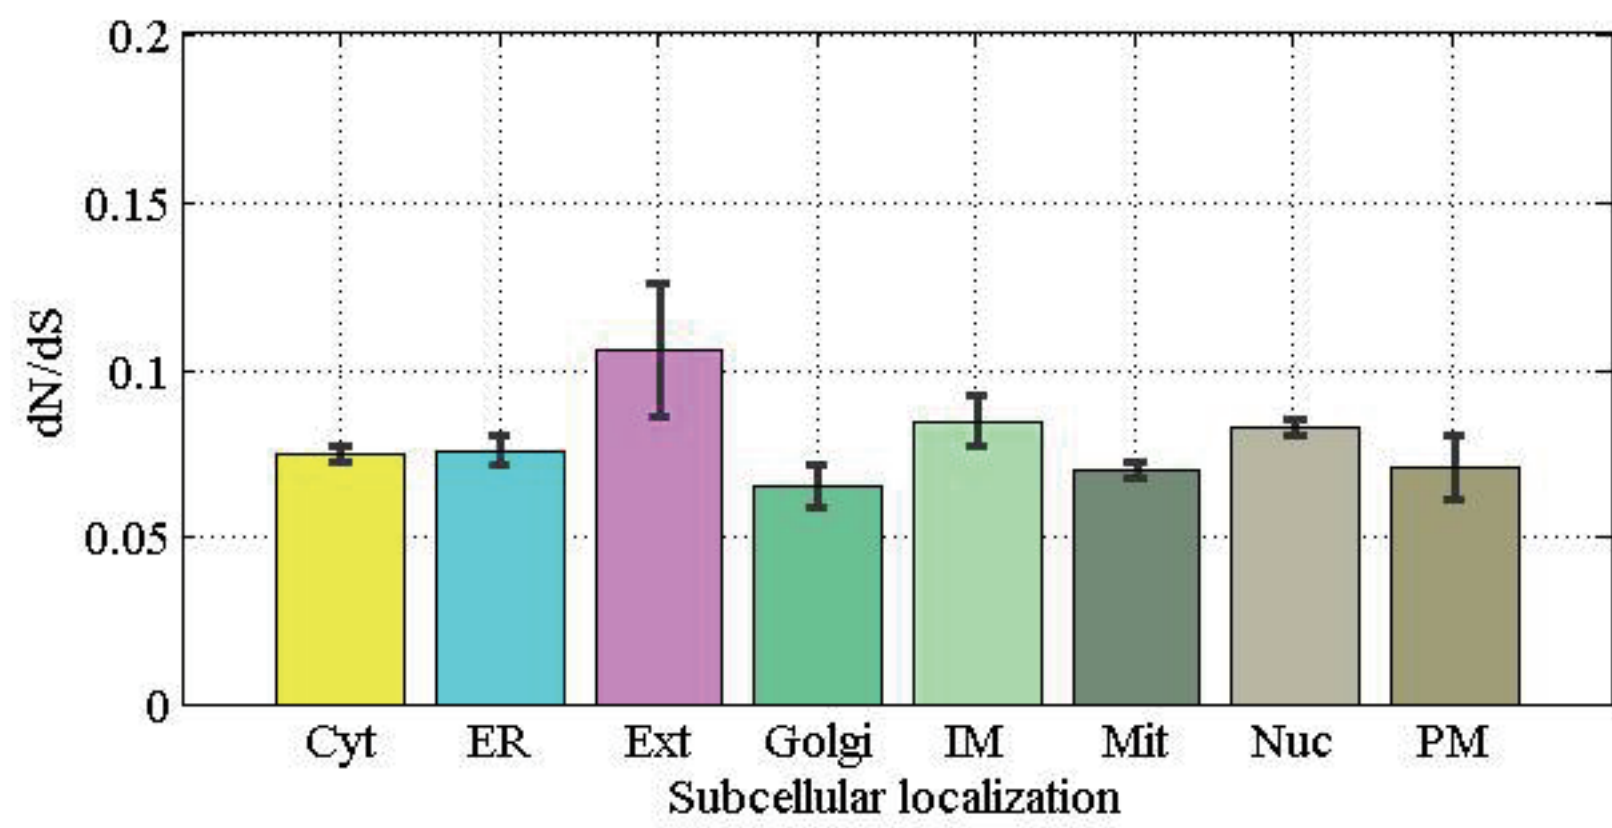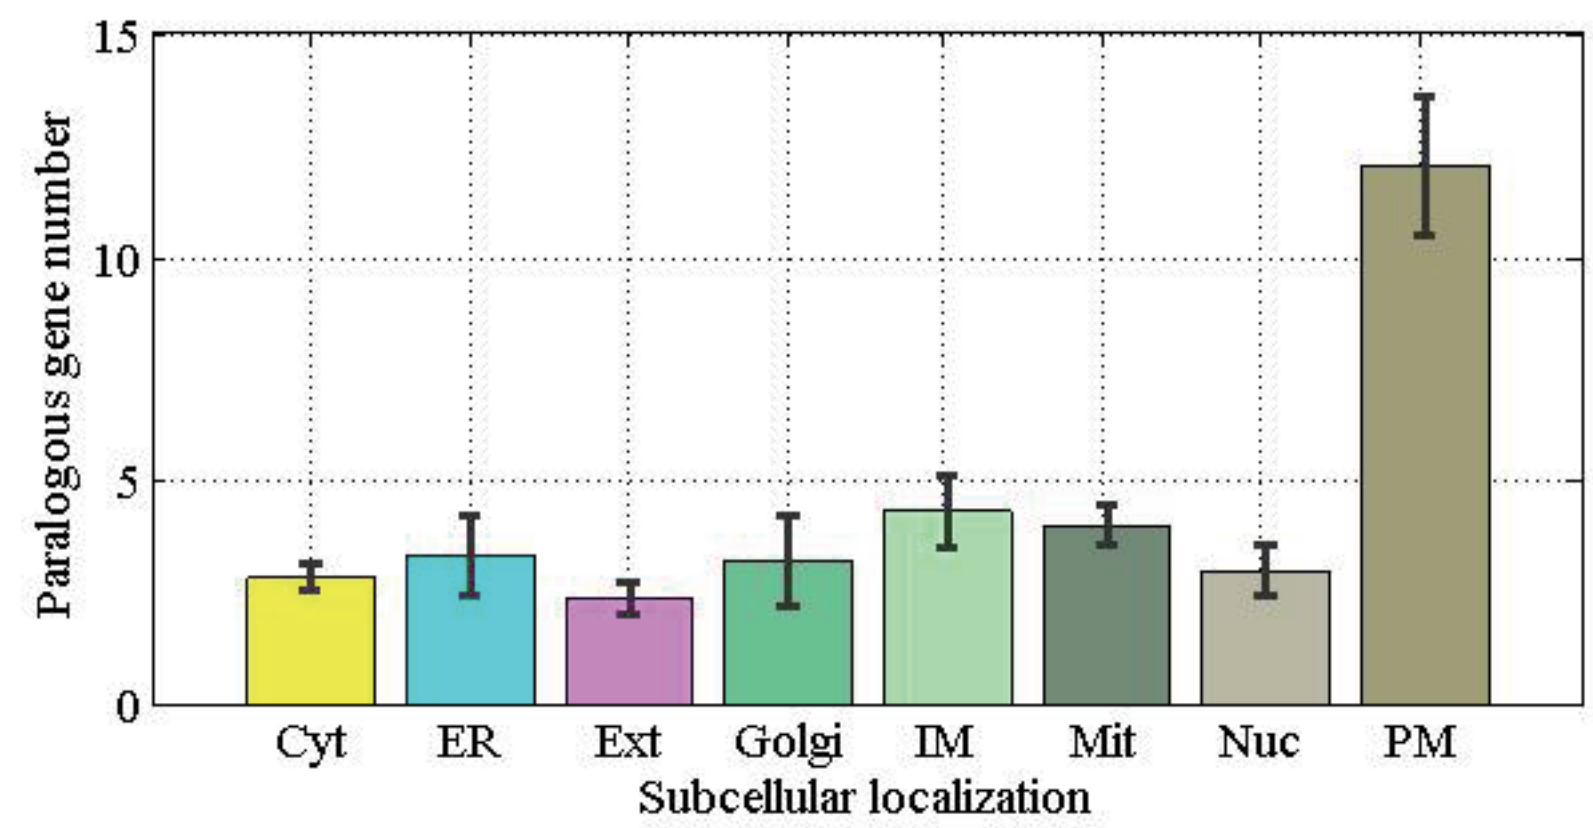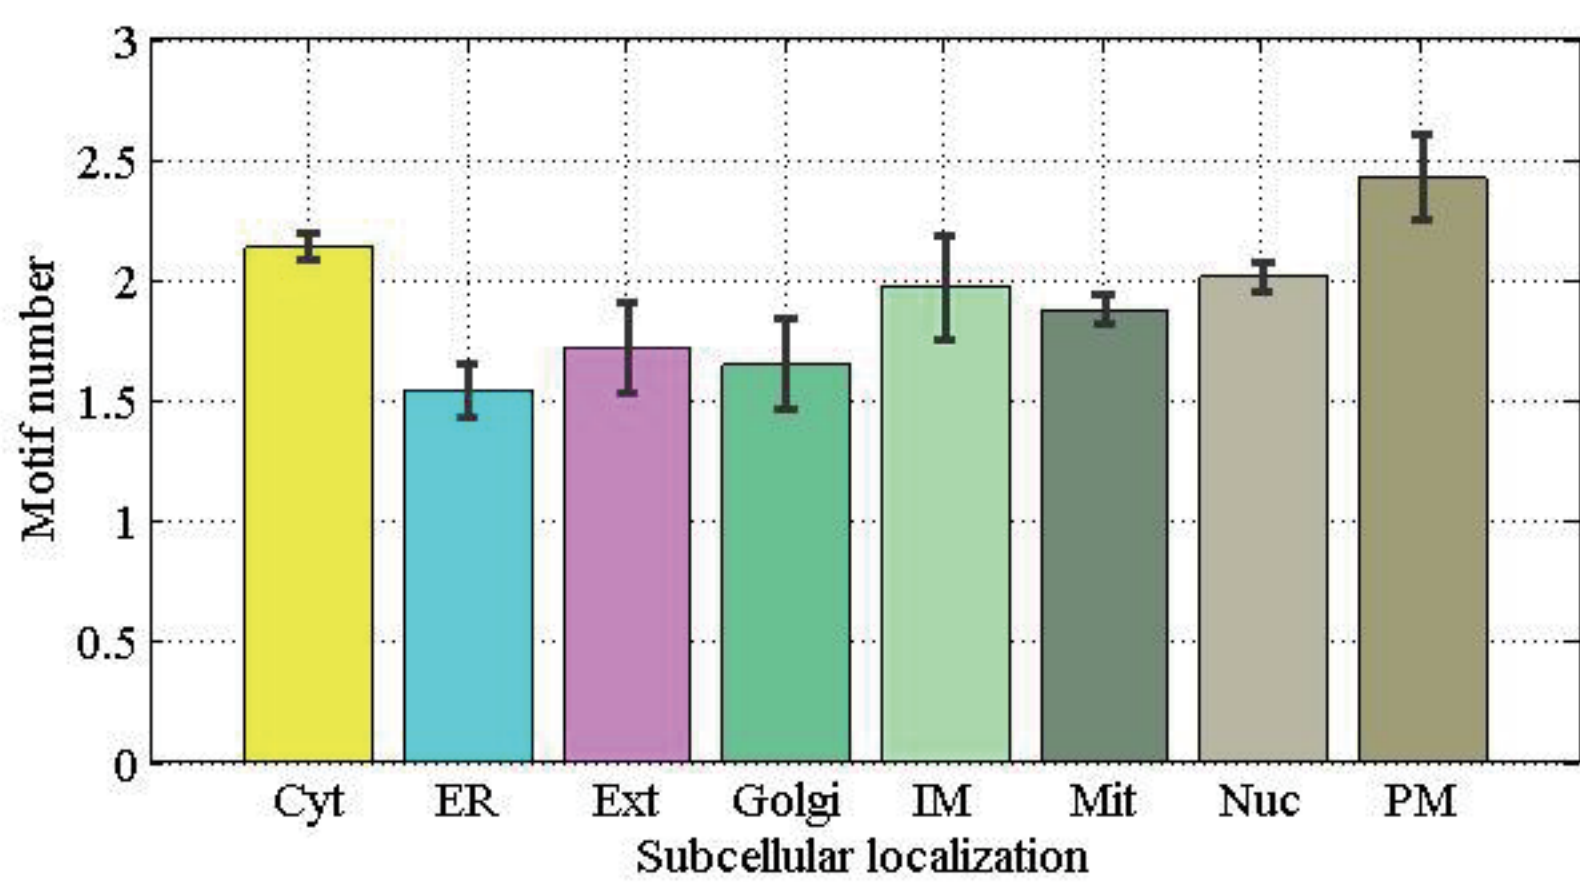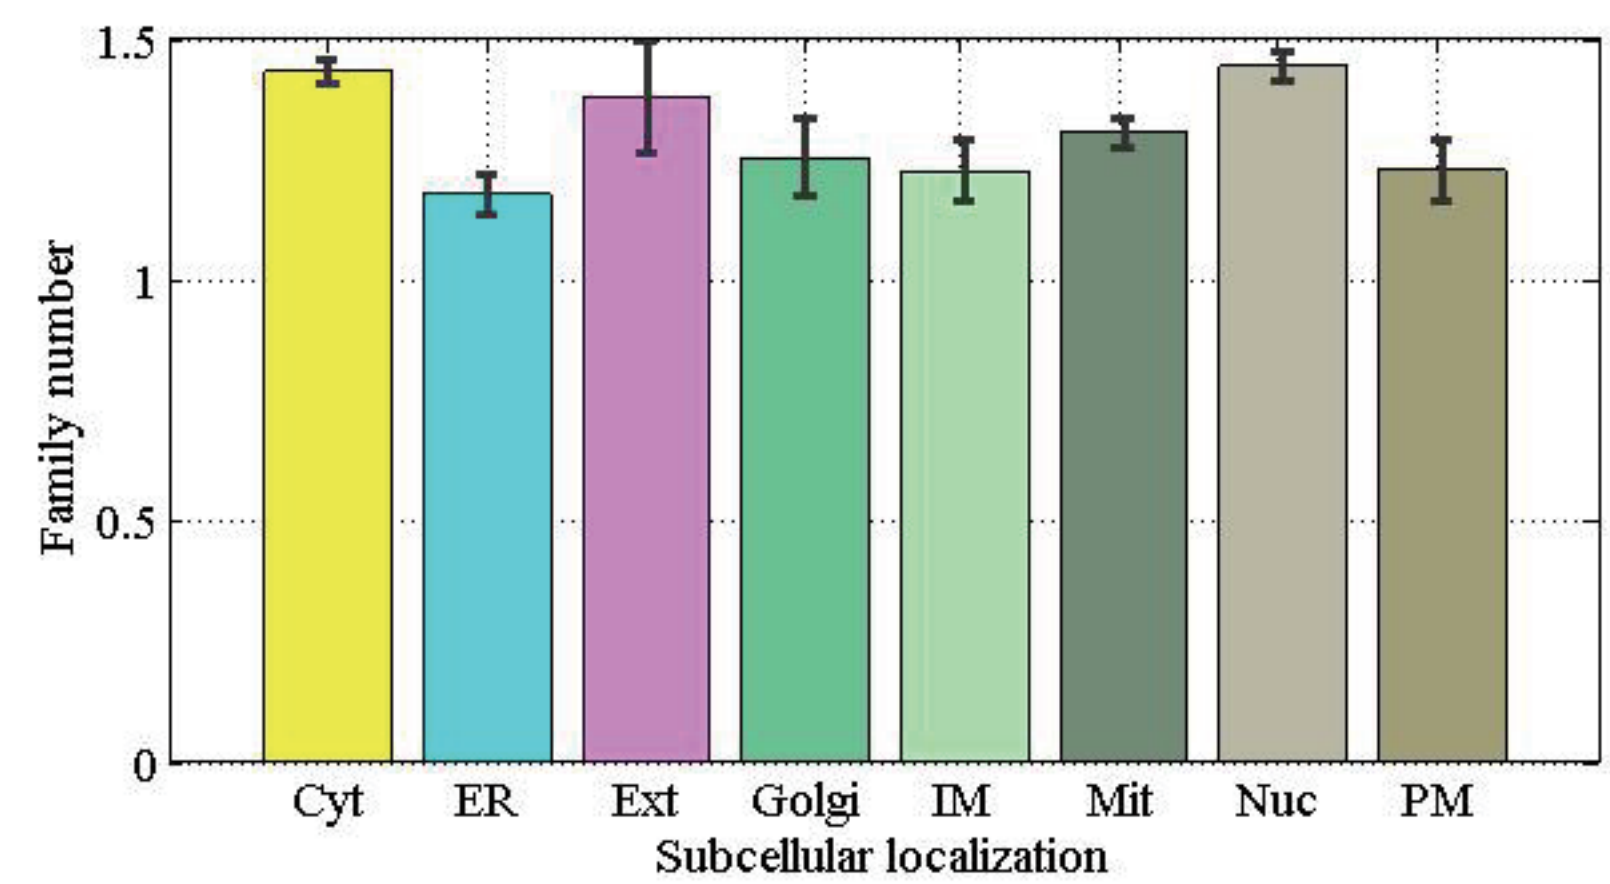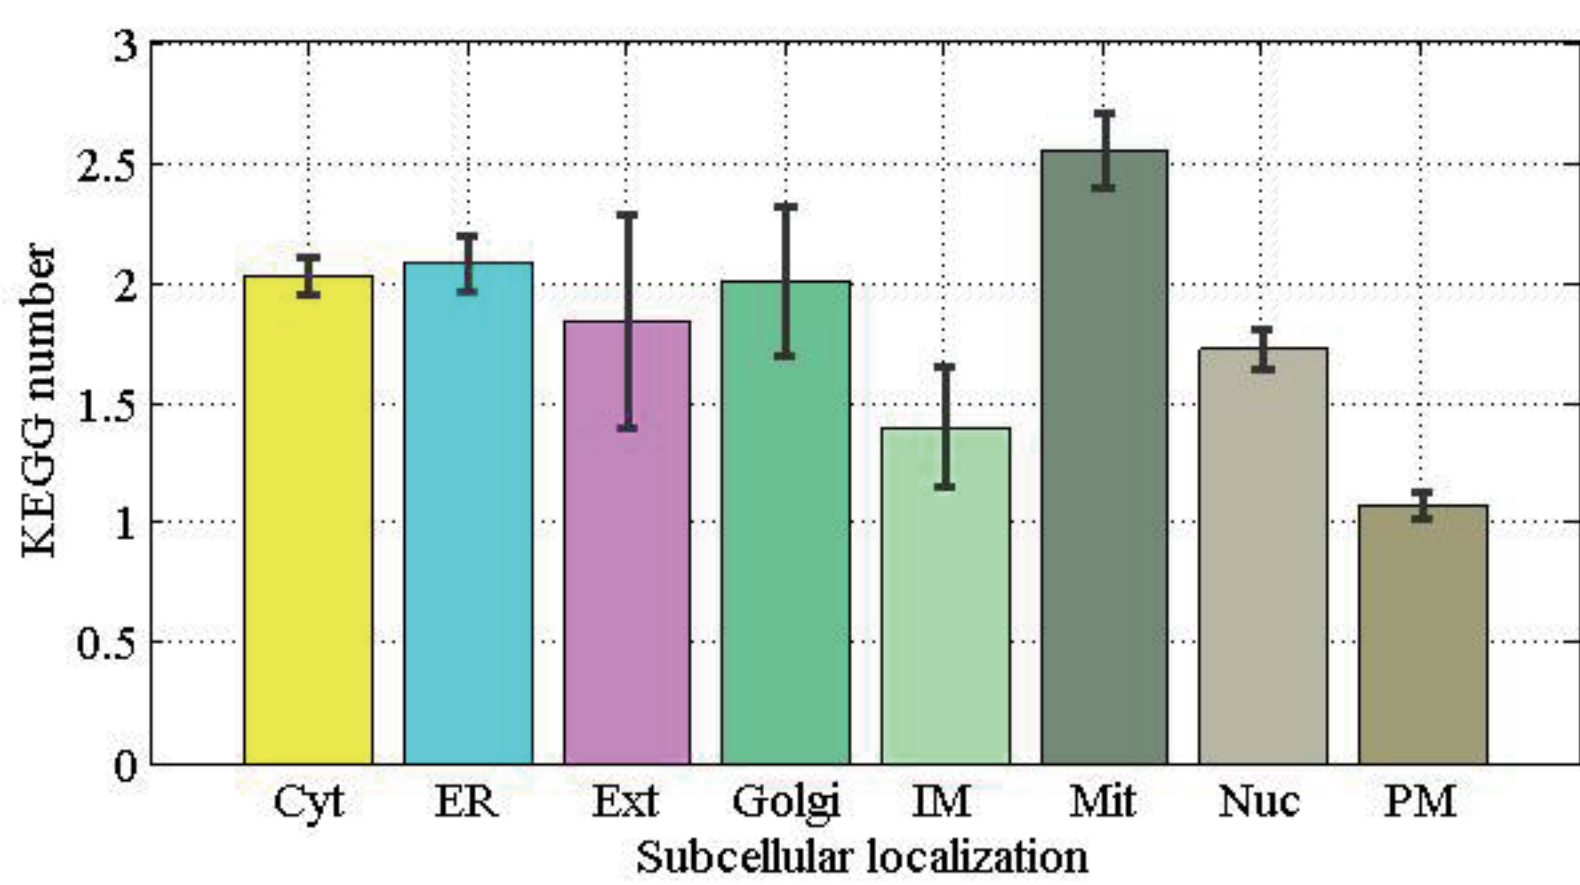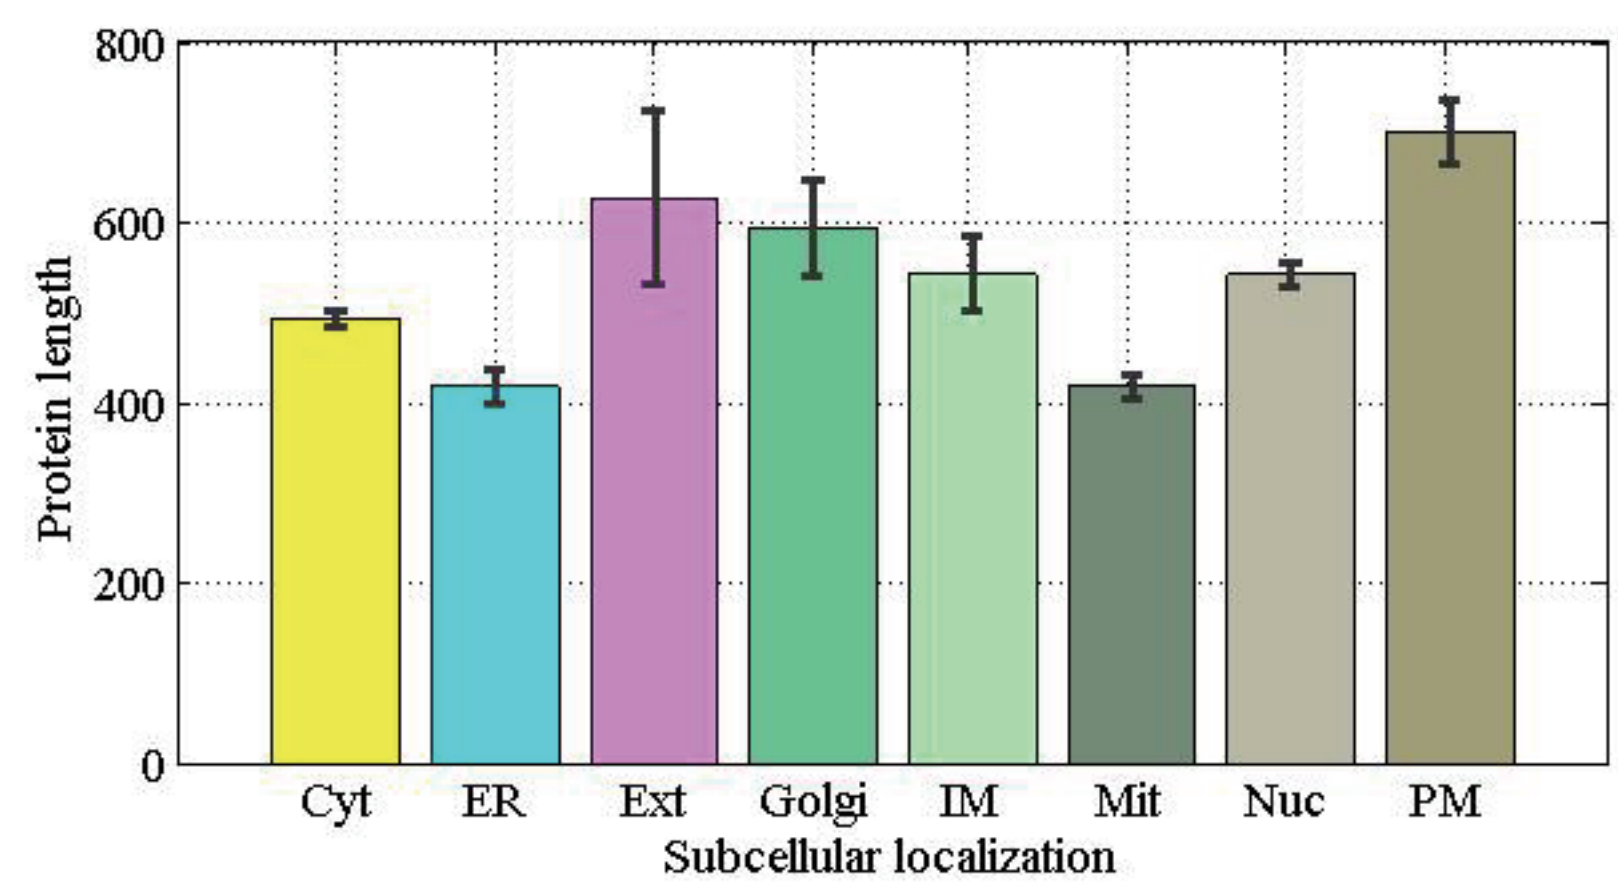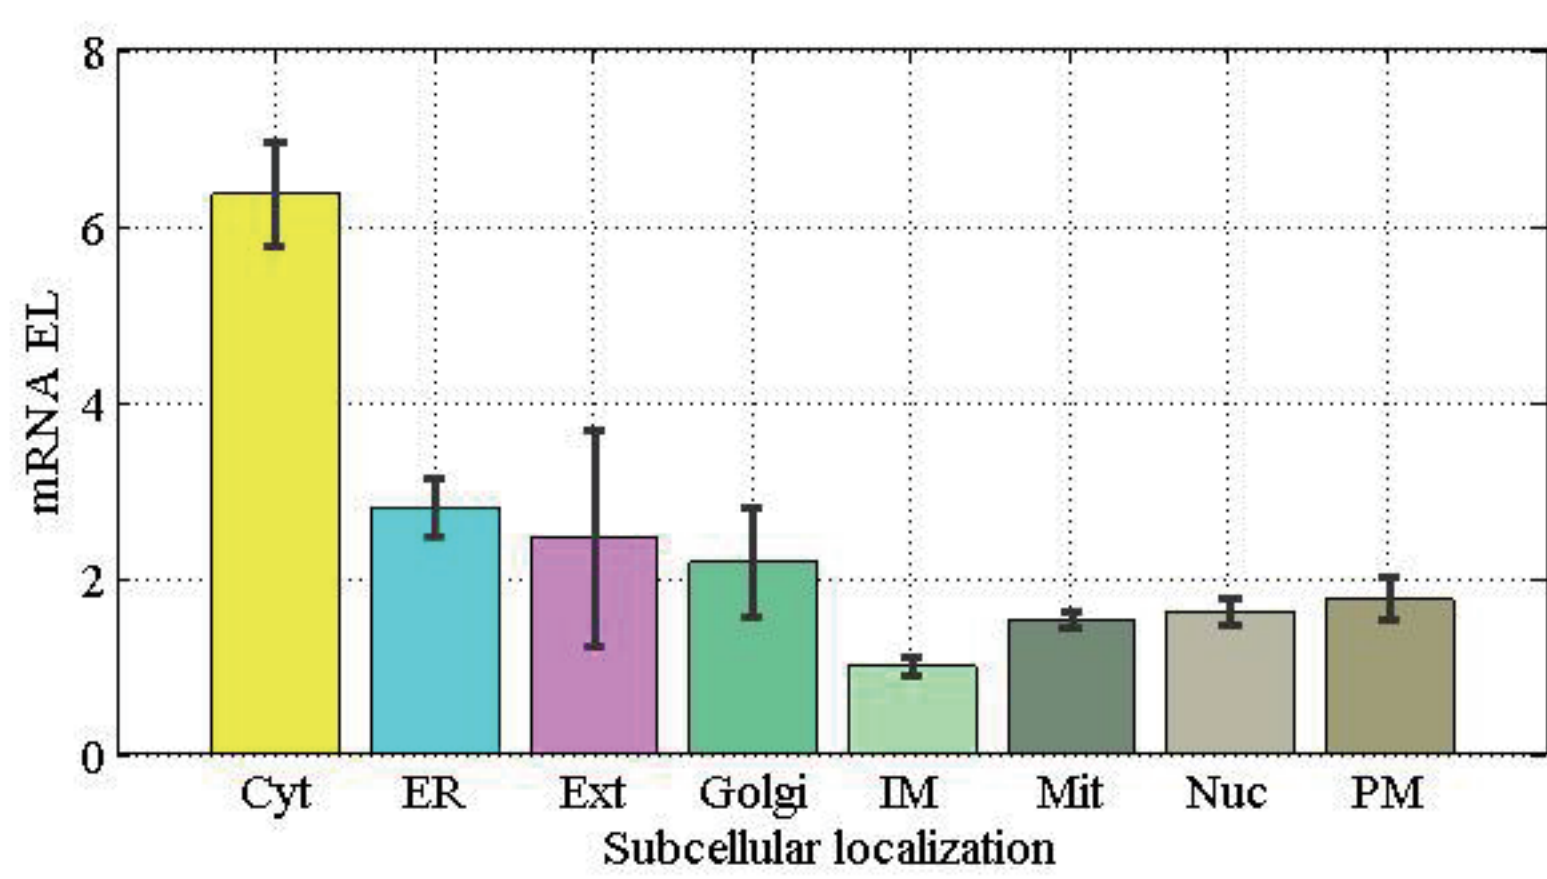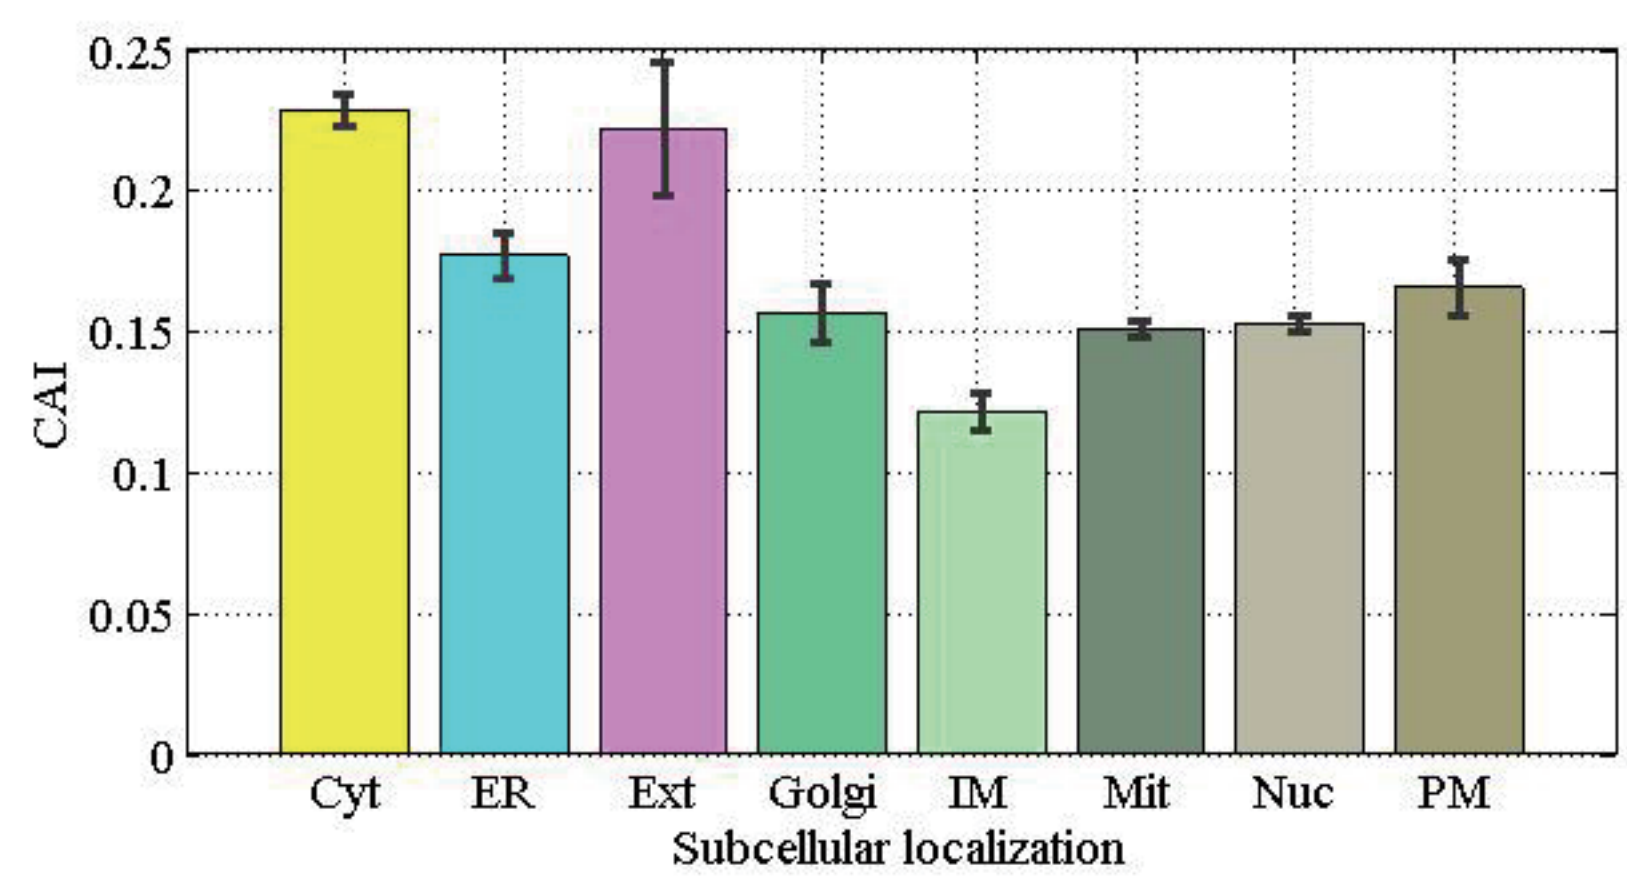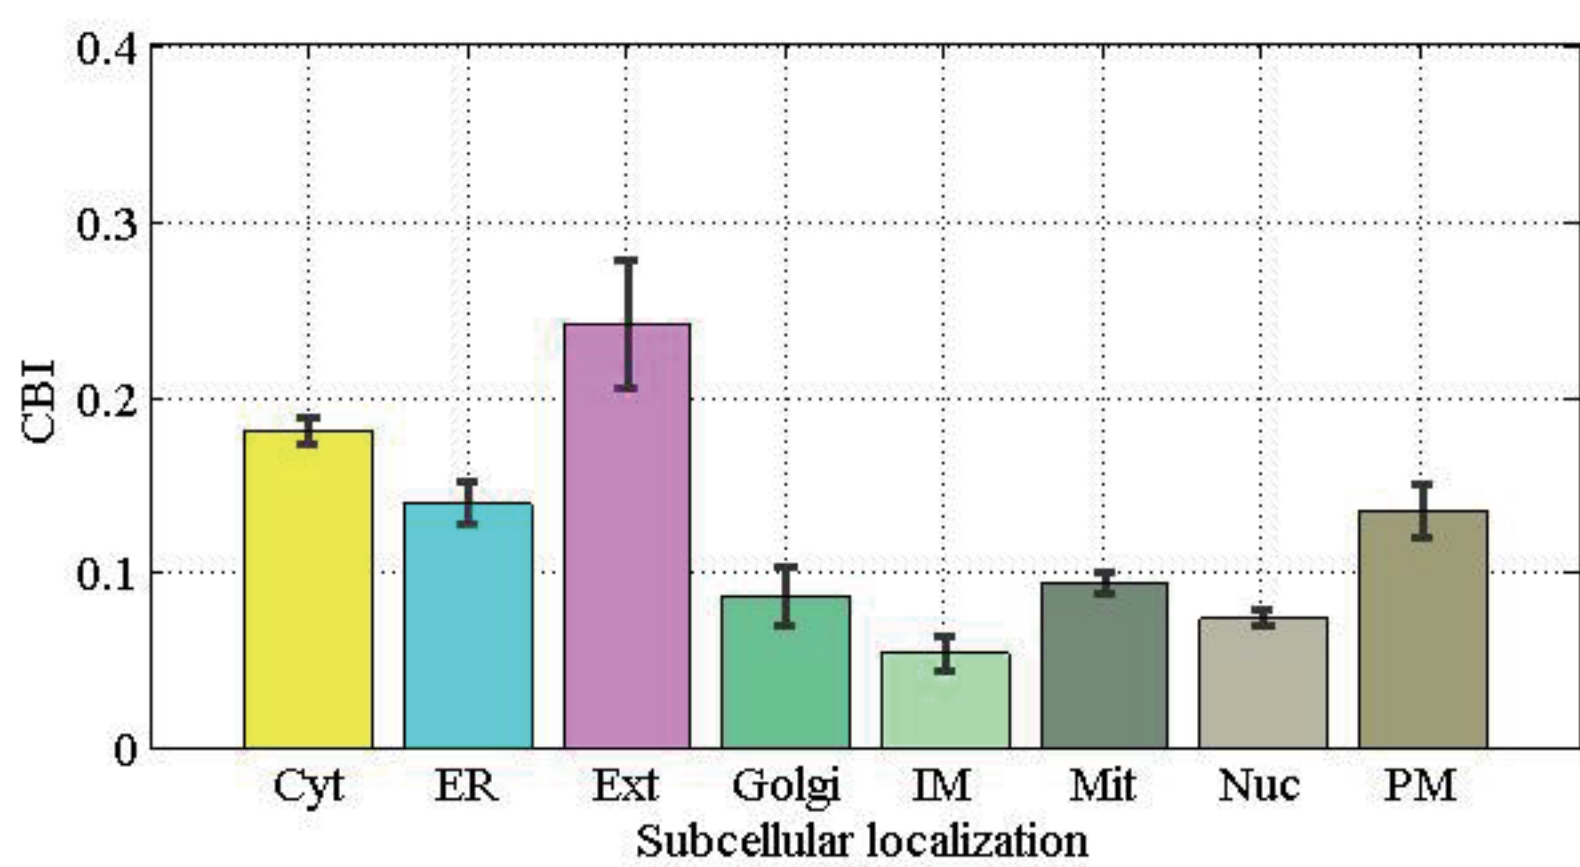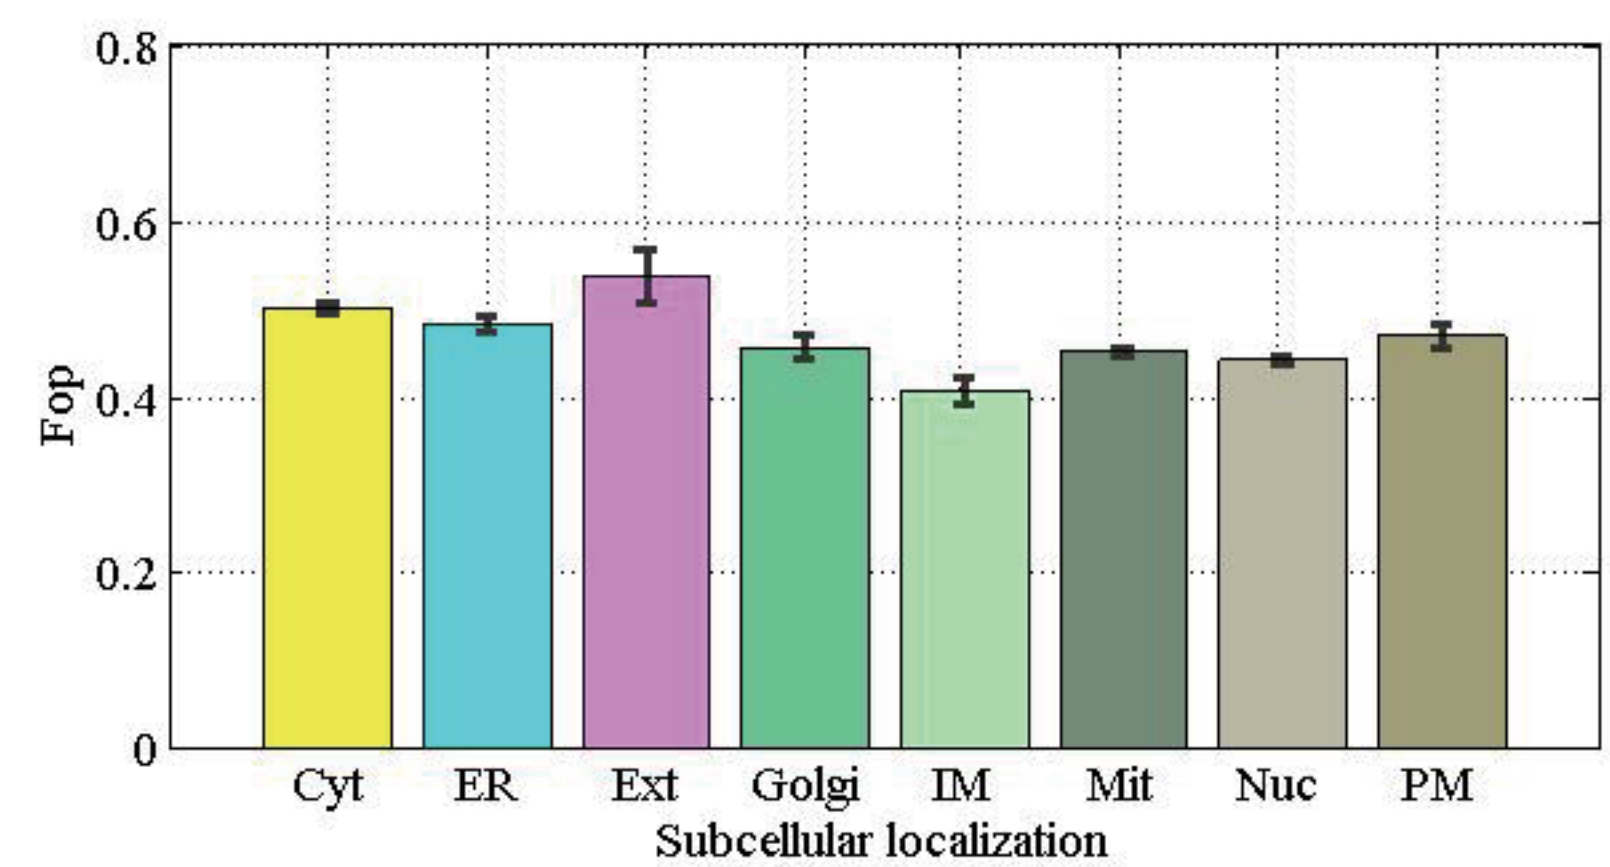

Supplement: c5mb00124b4.pdf [file c5mb00124b4.pdf]

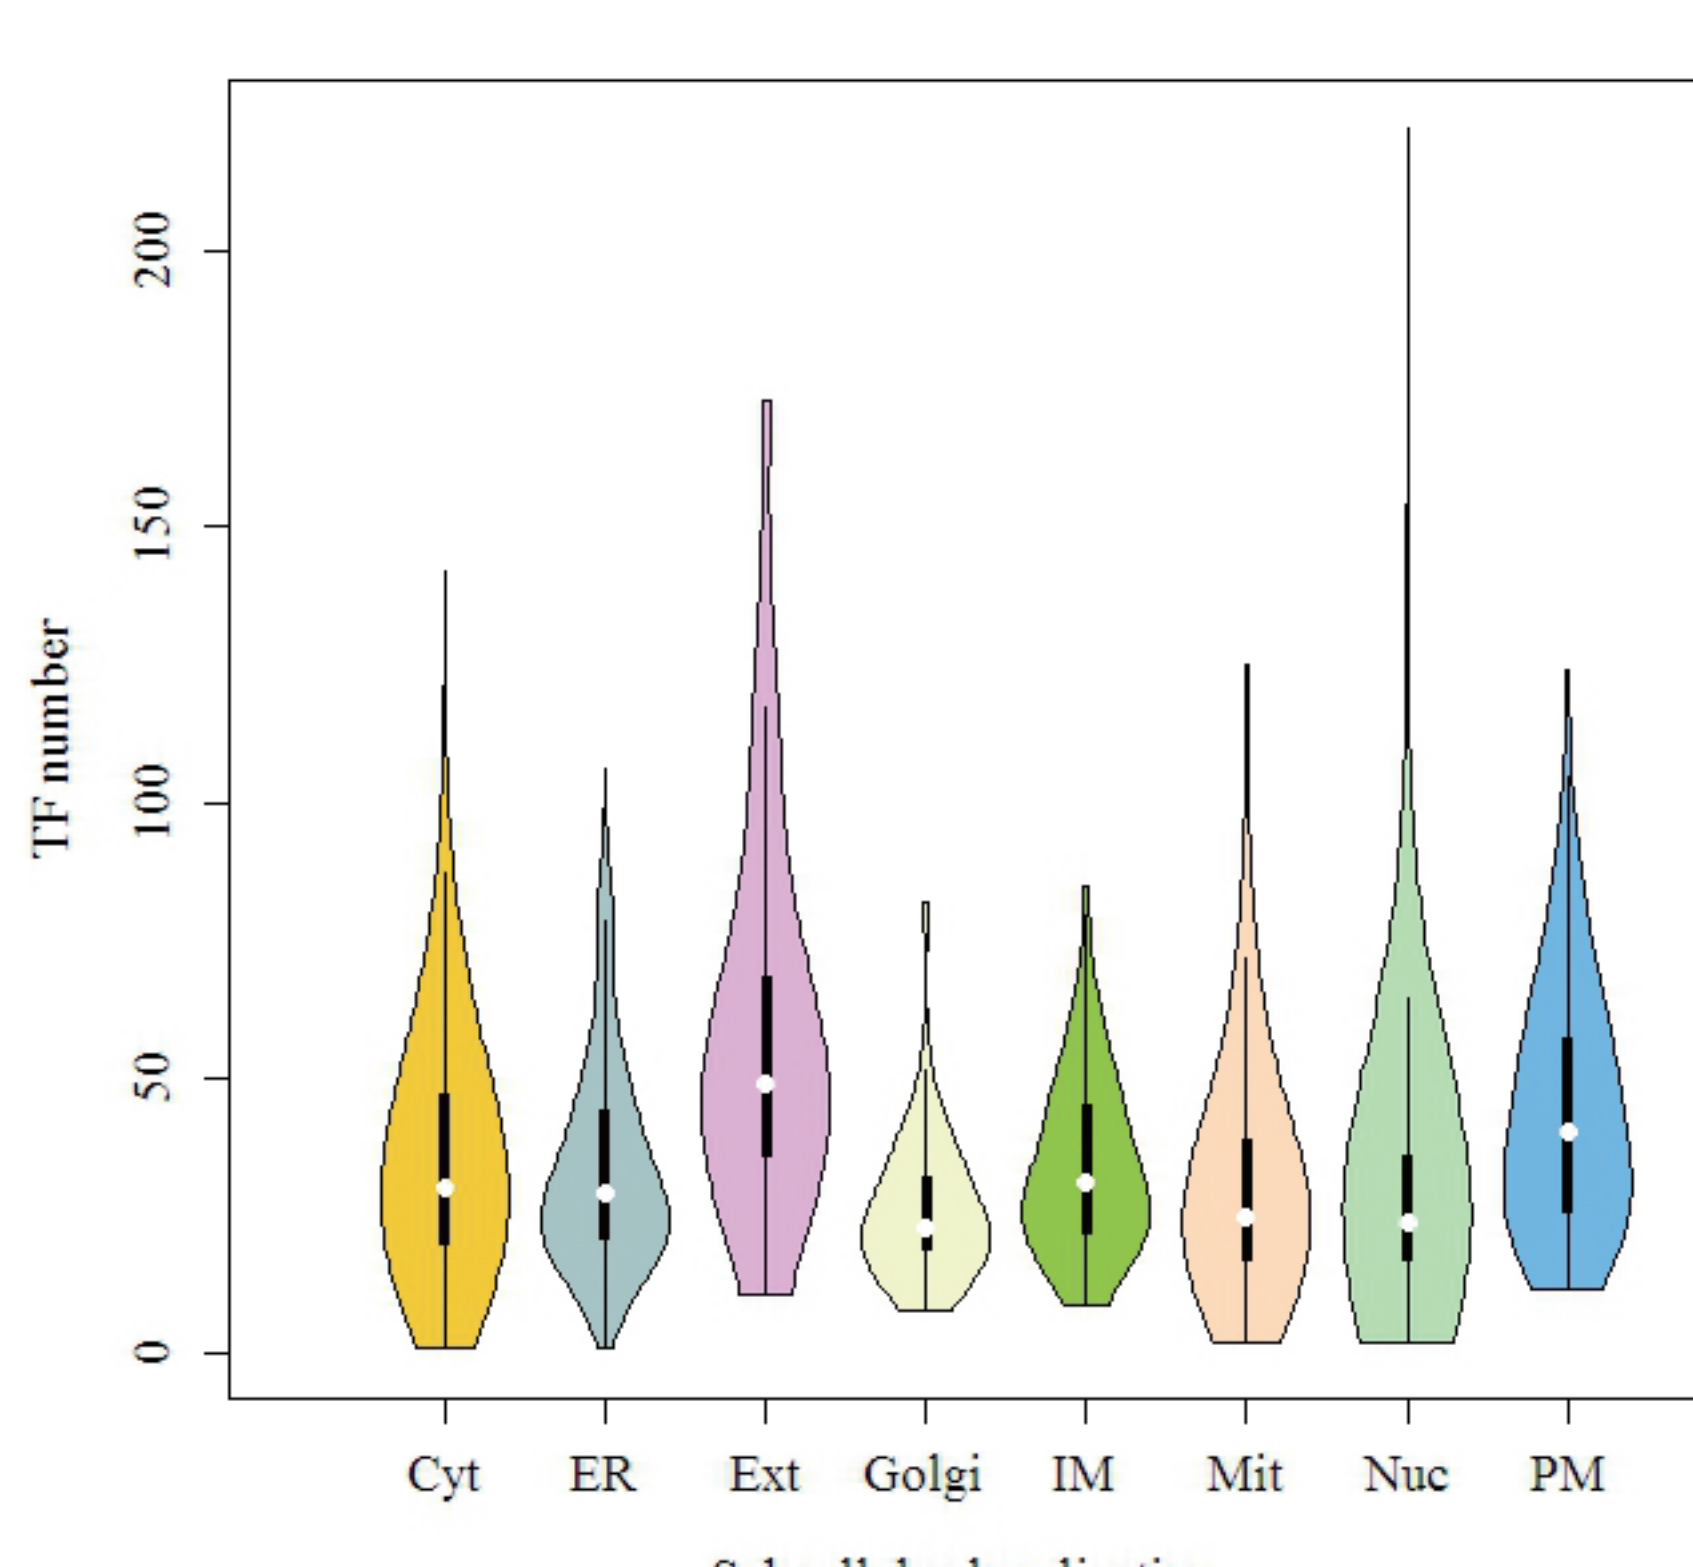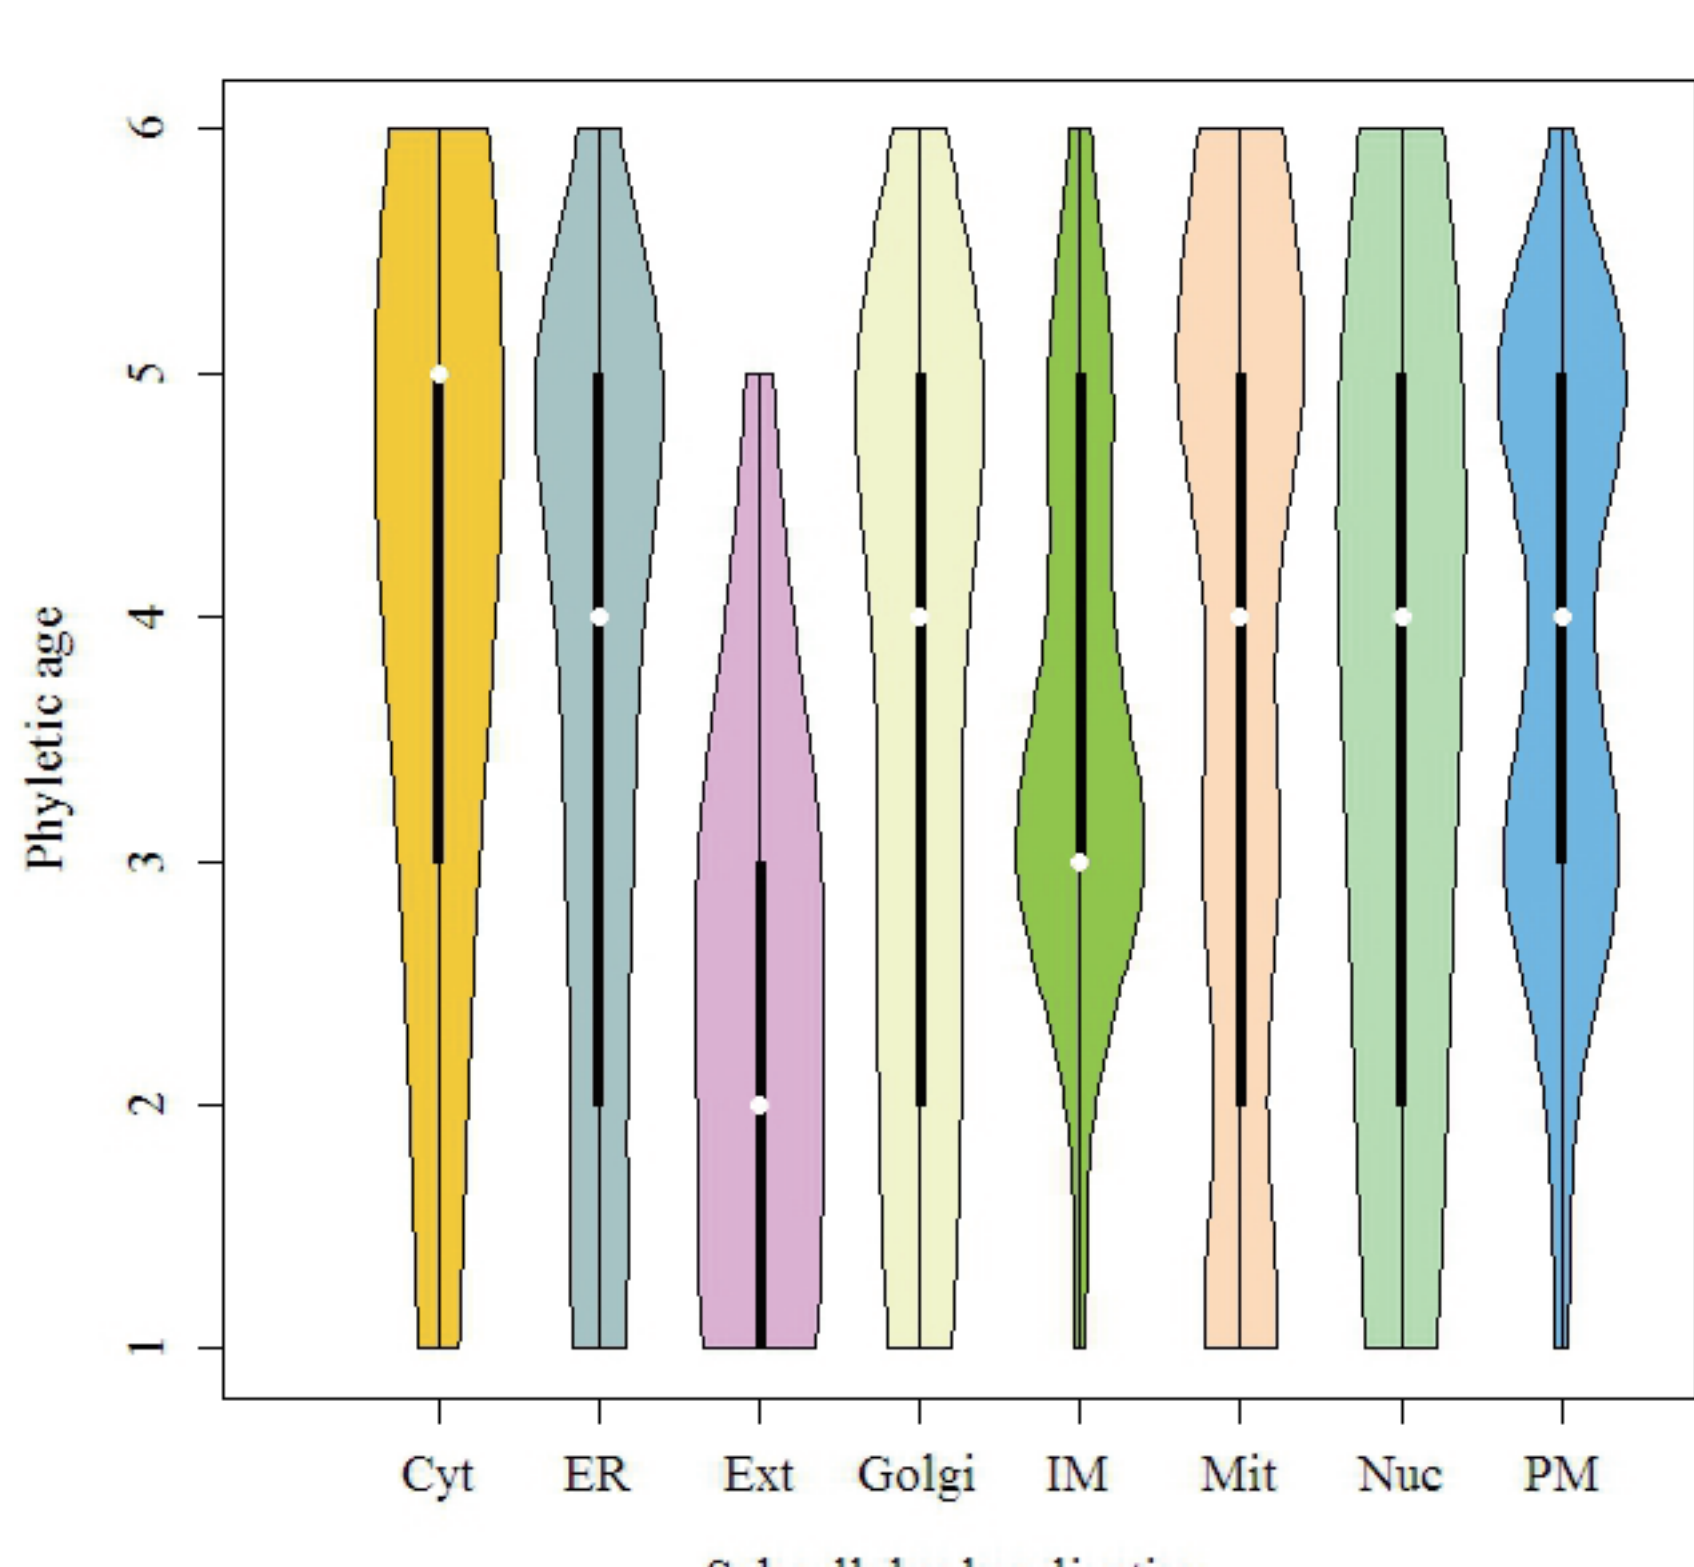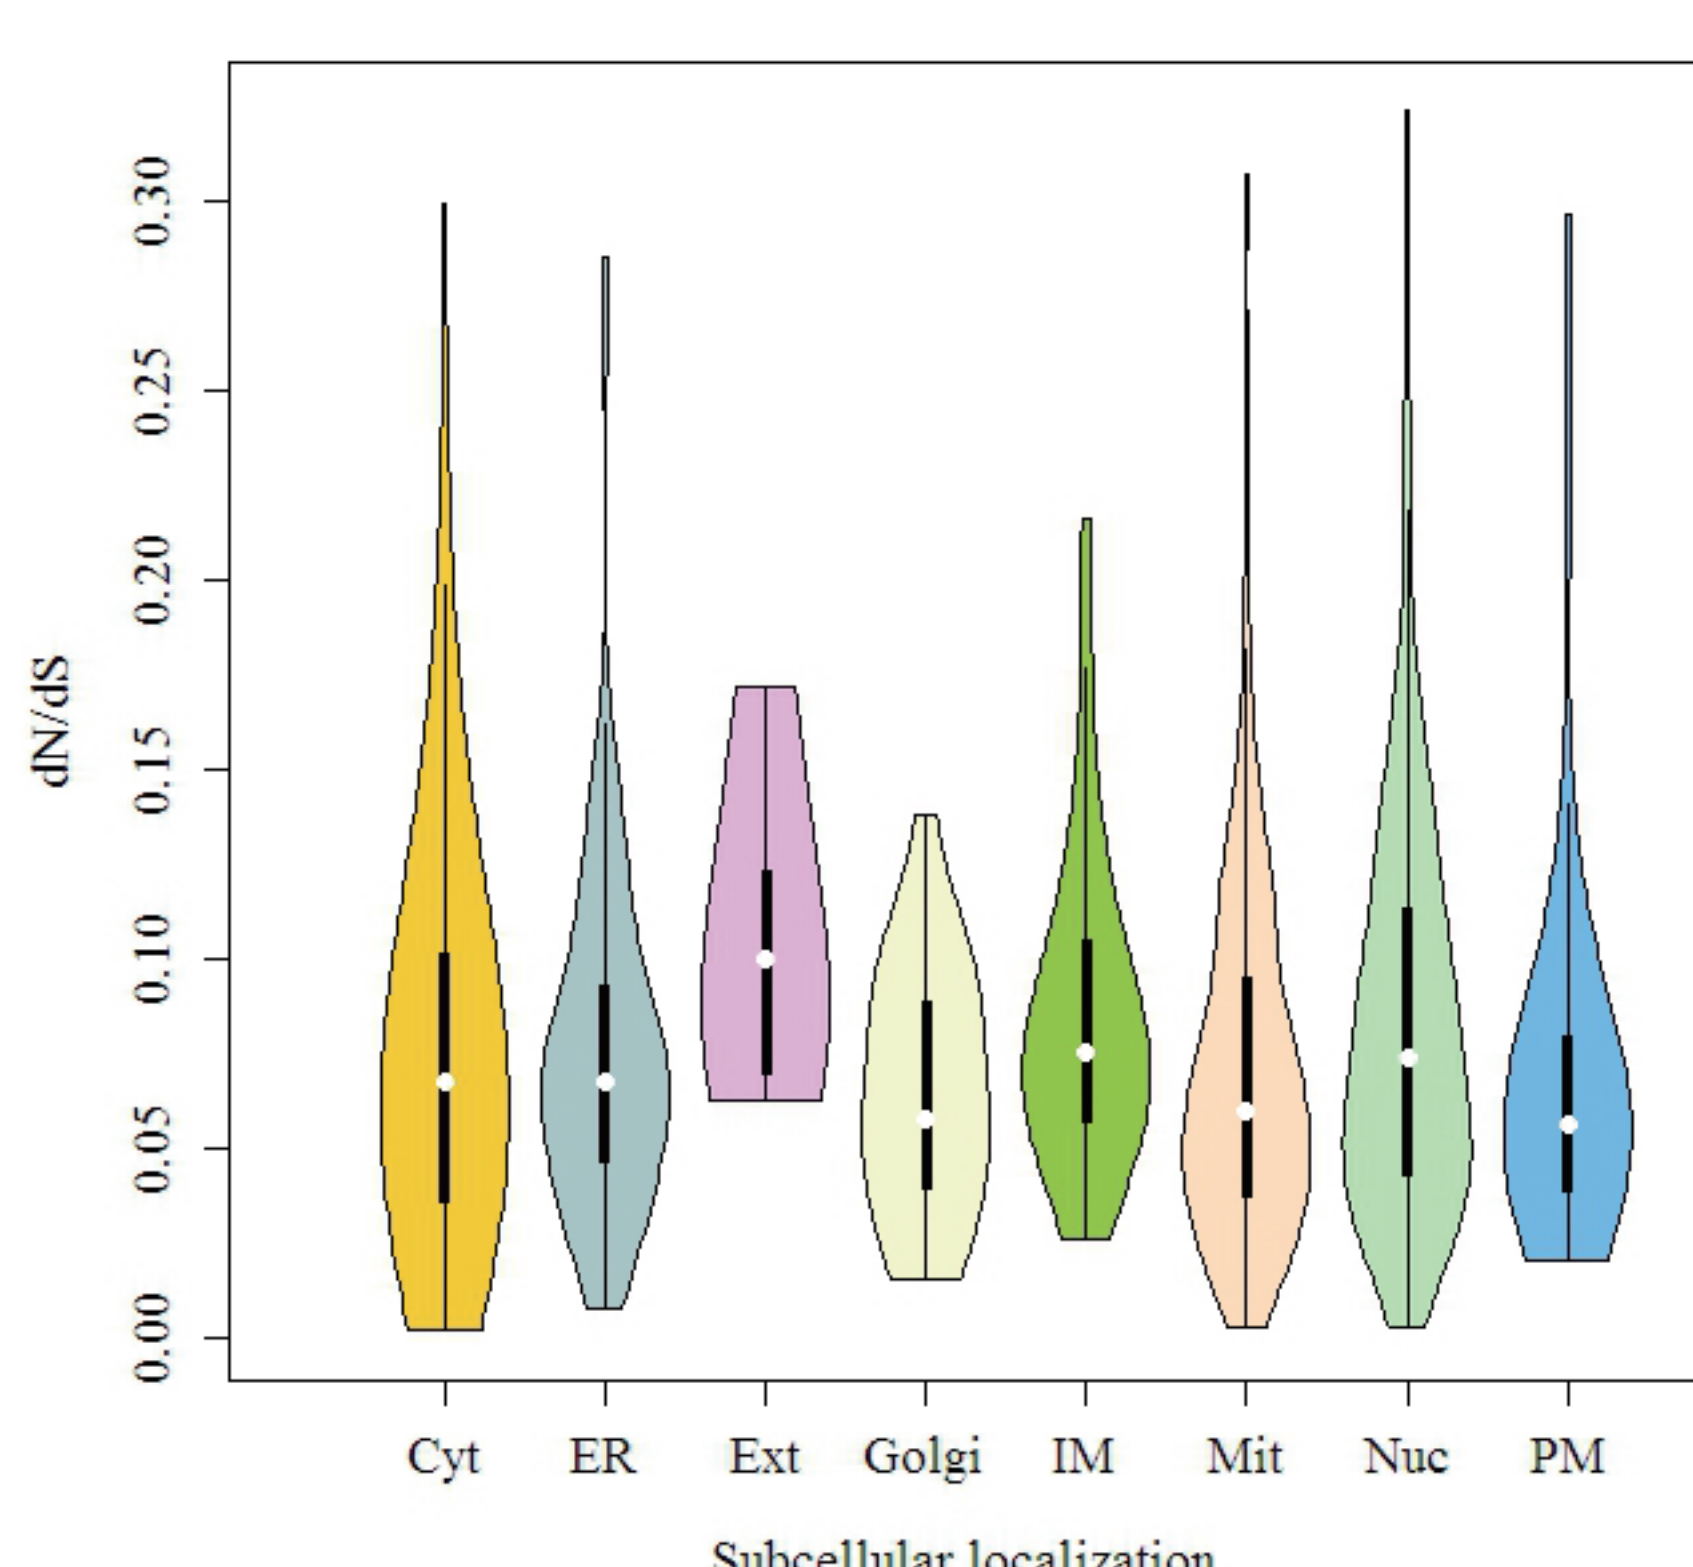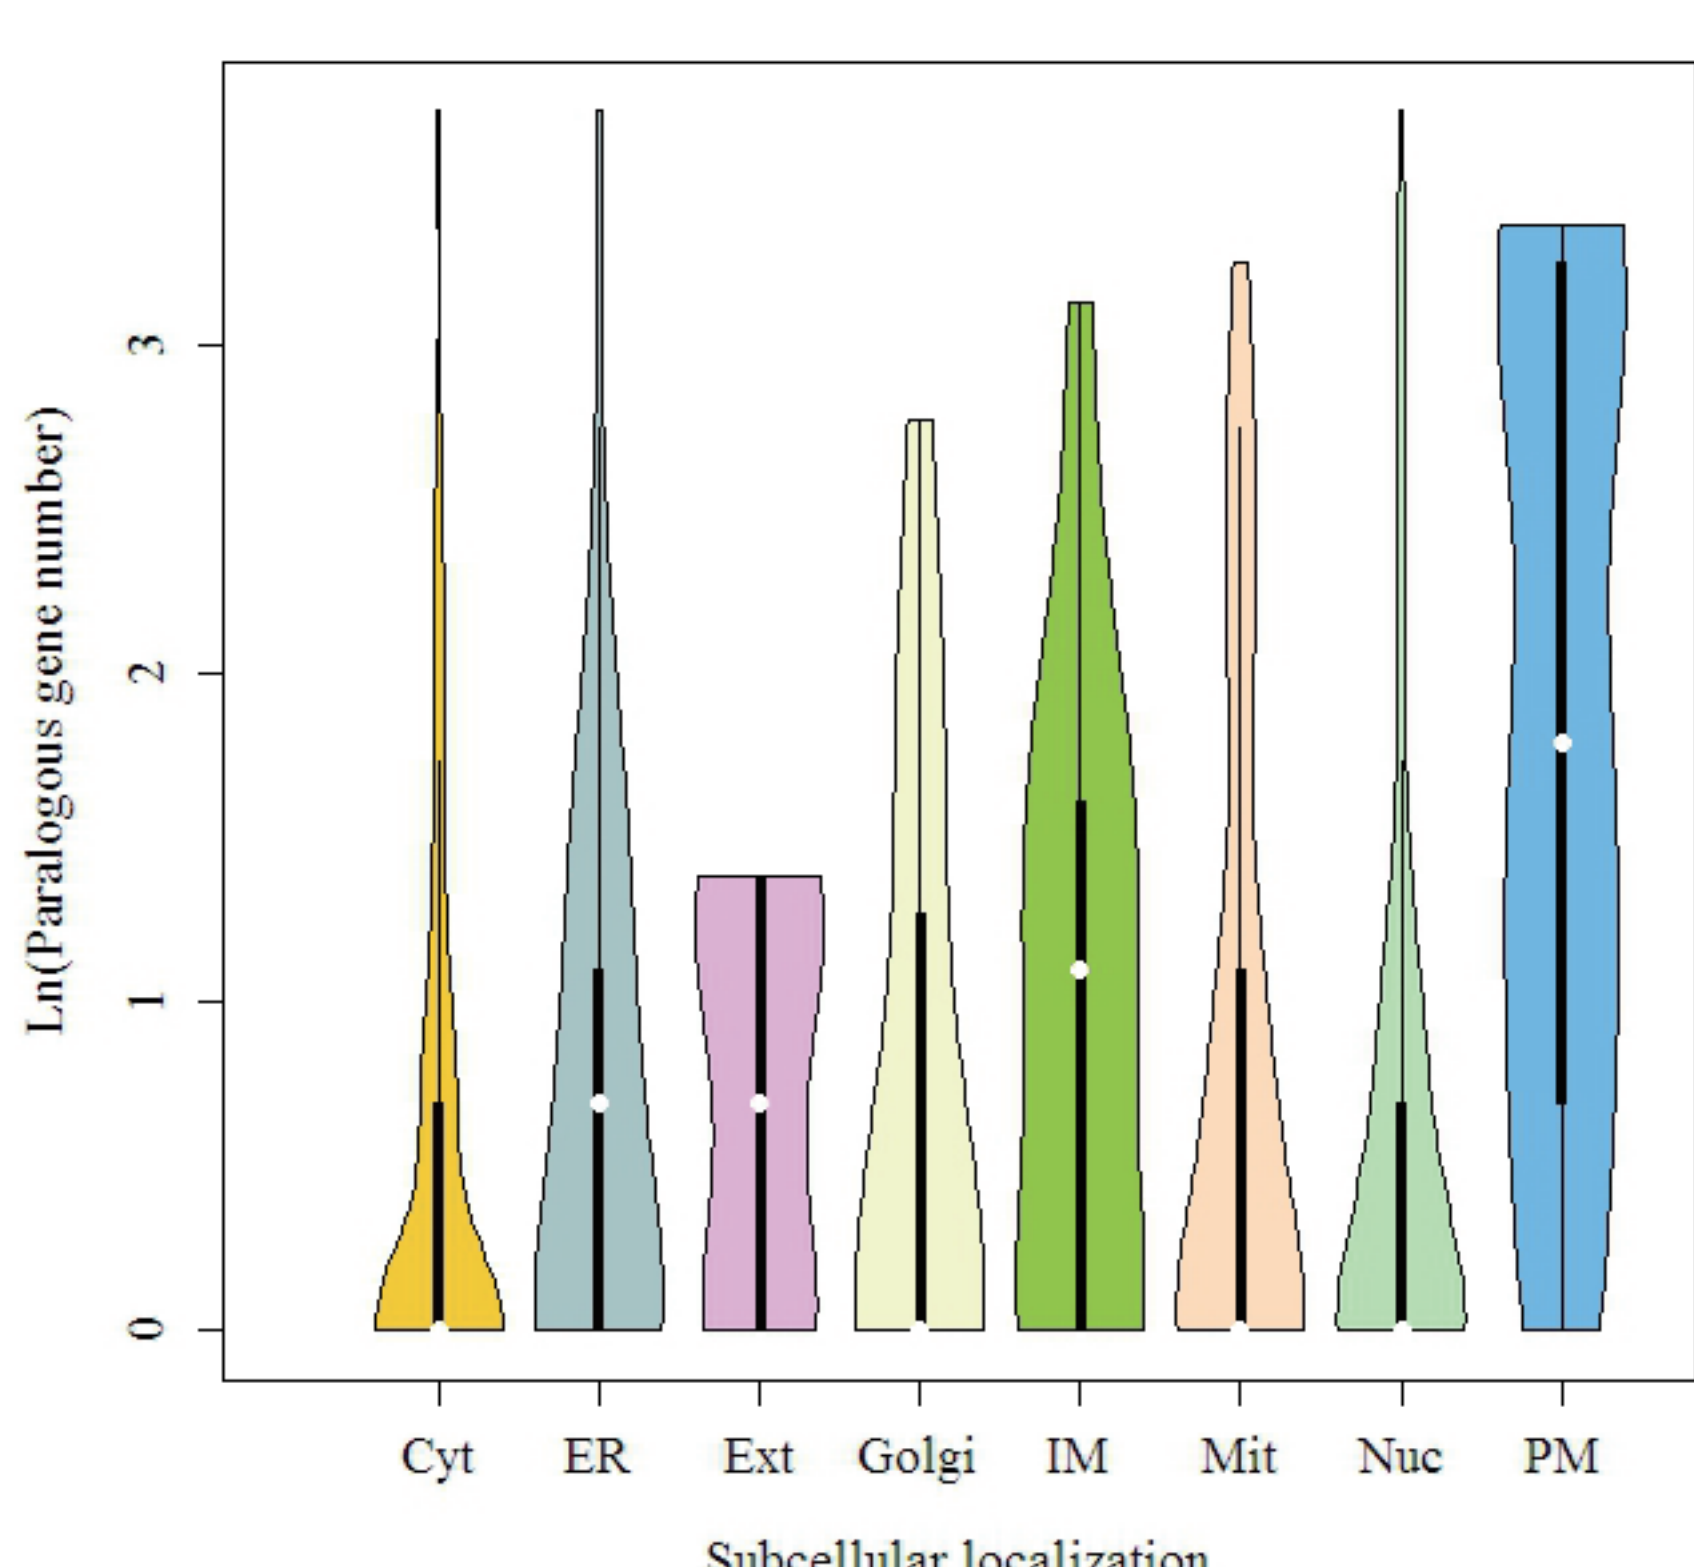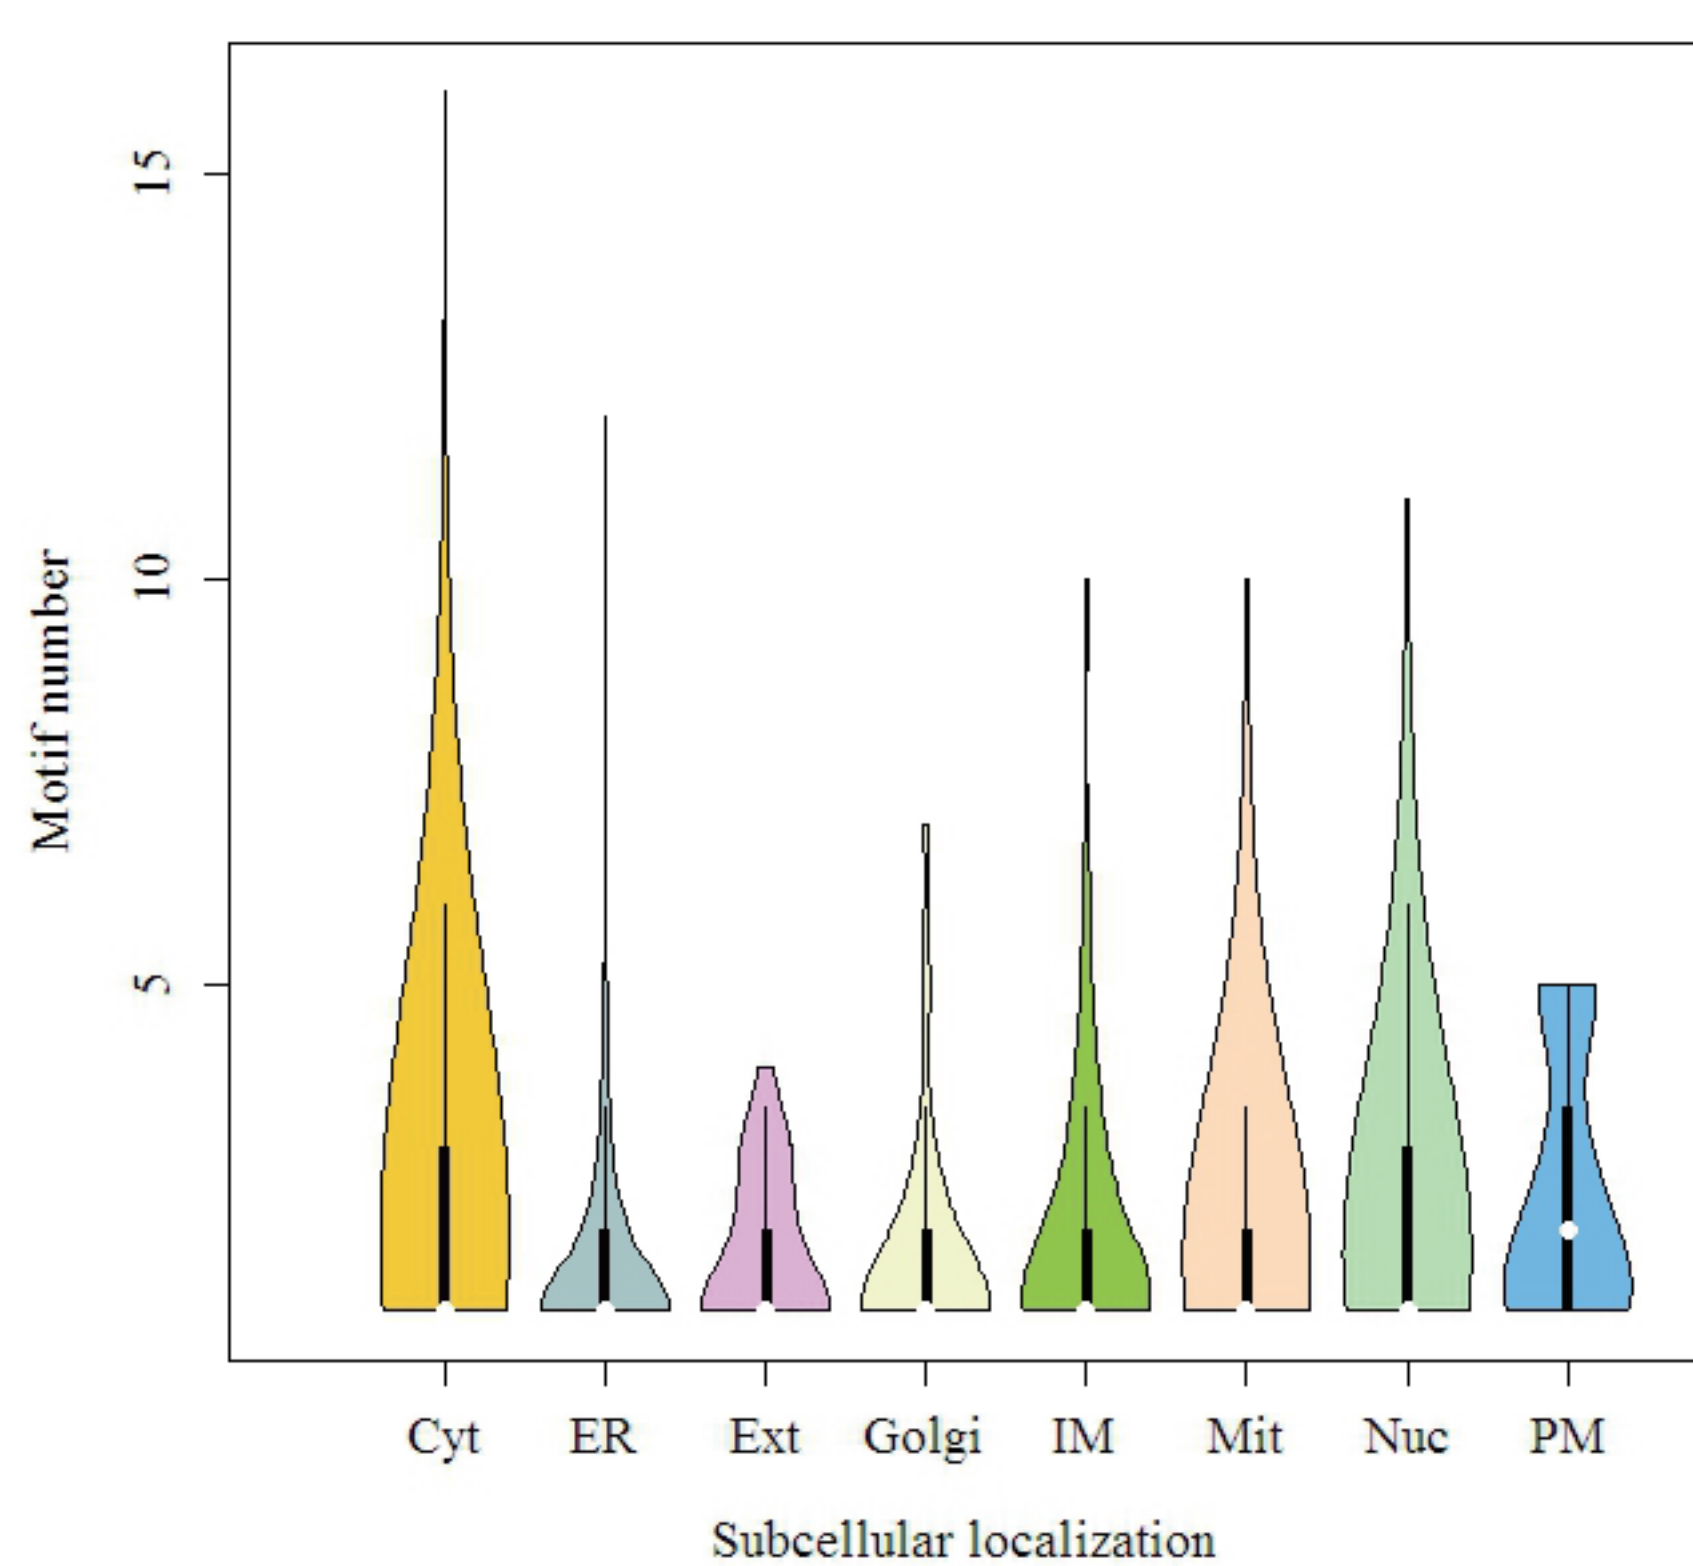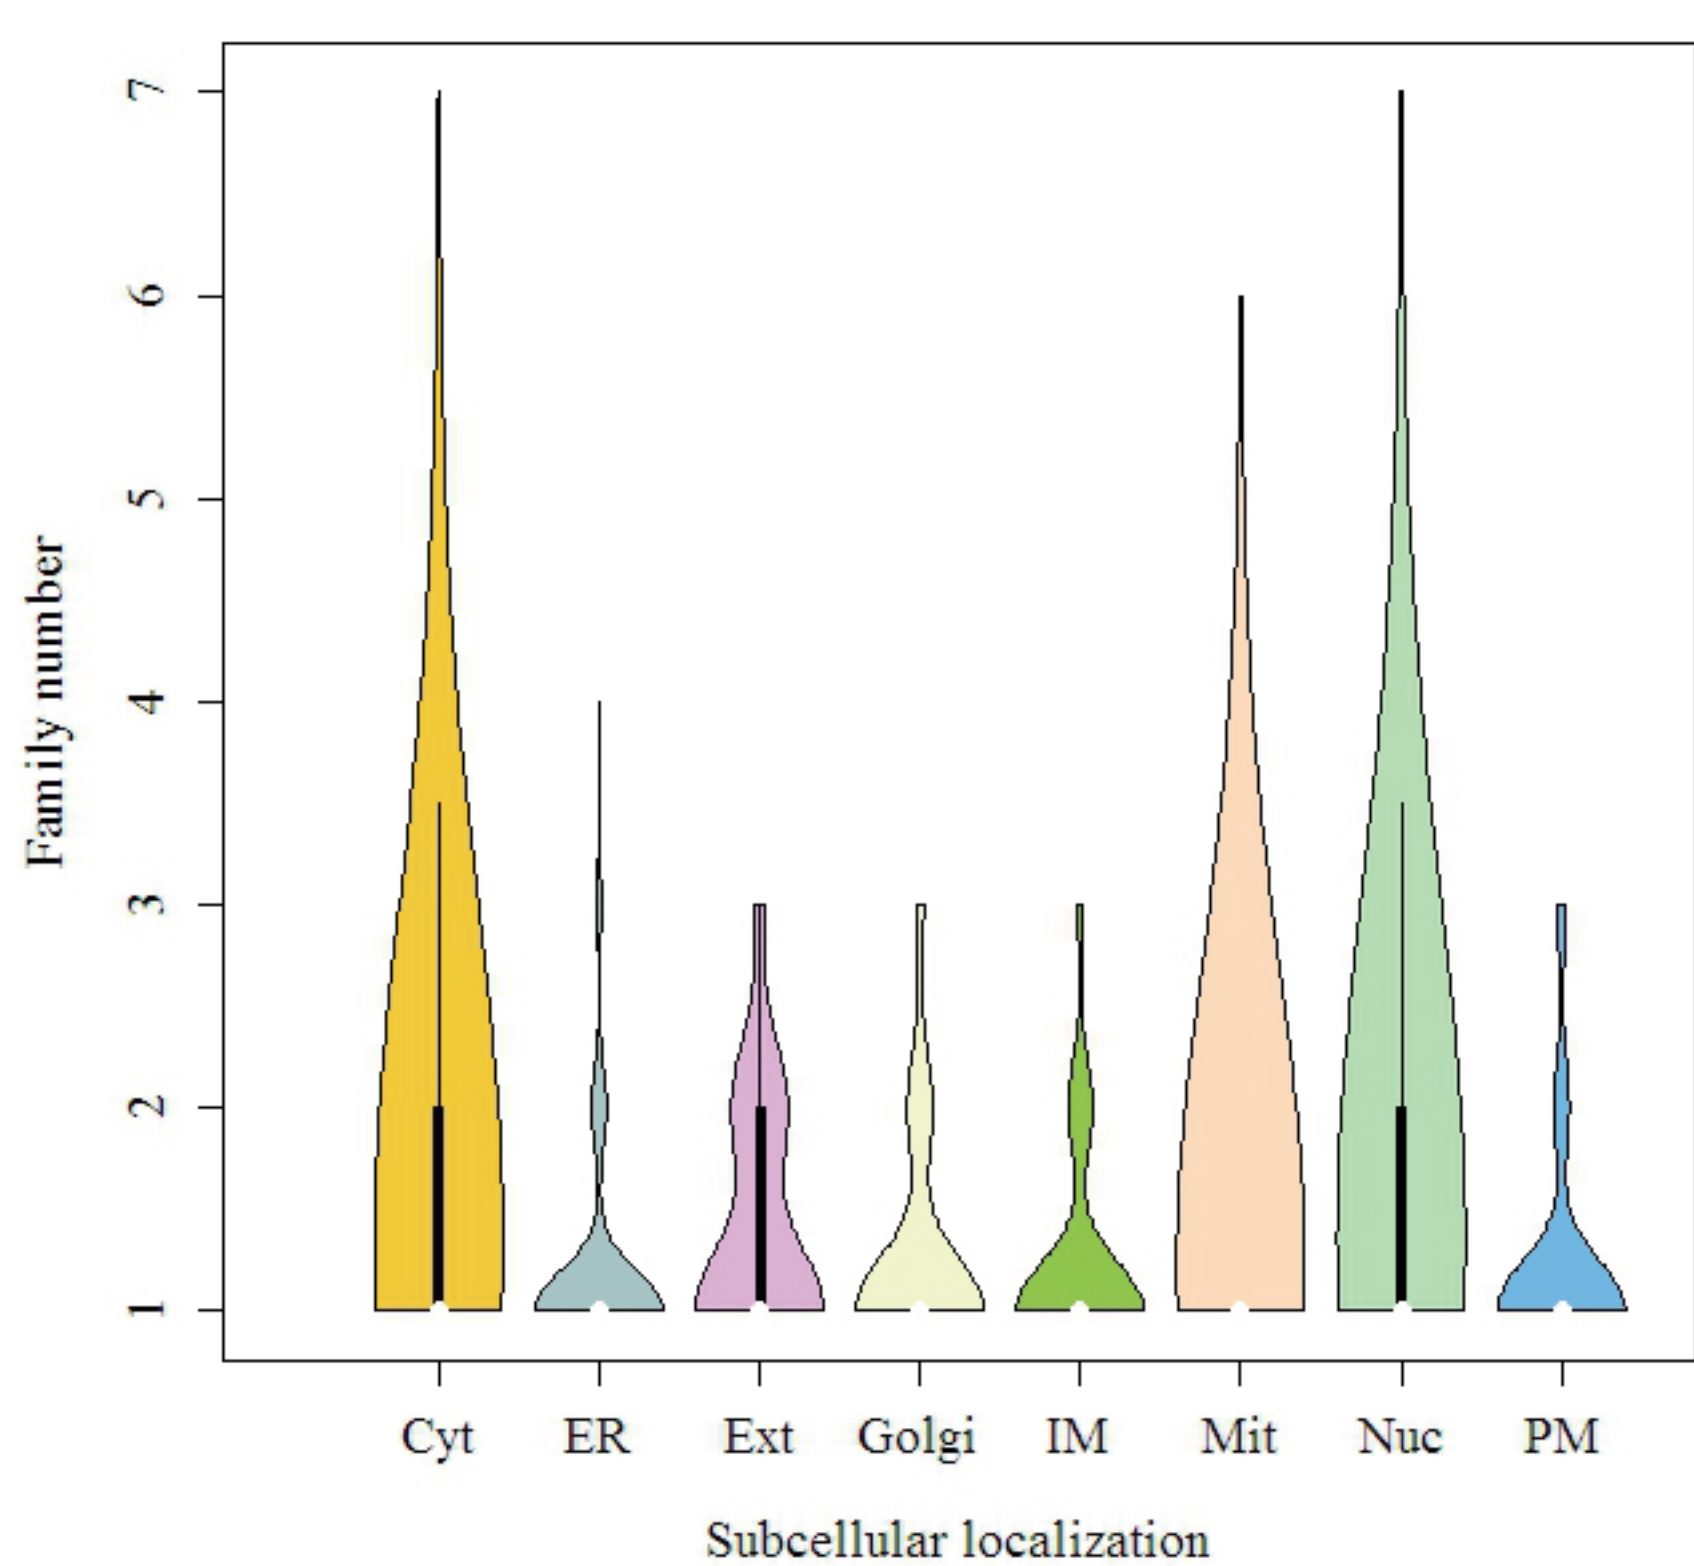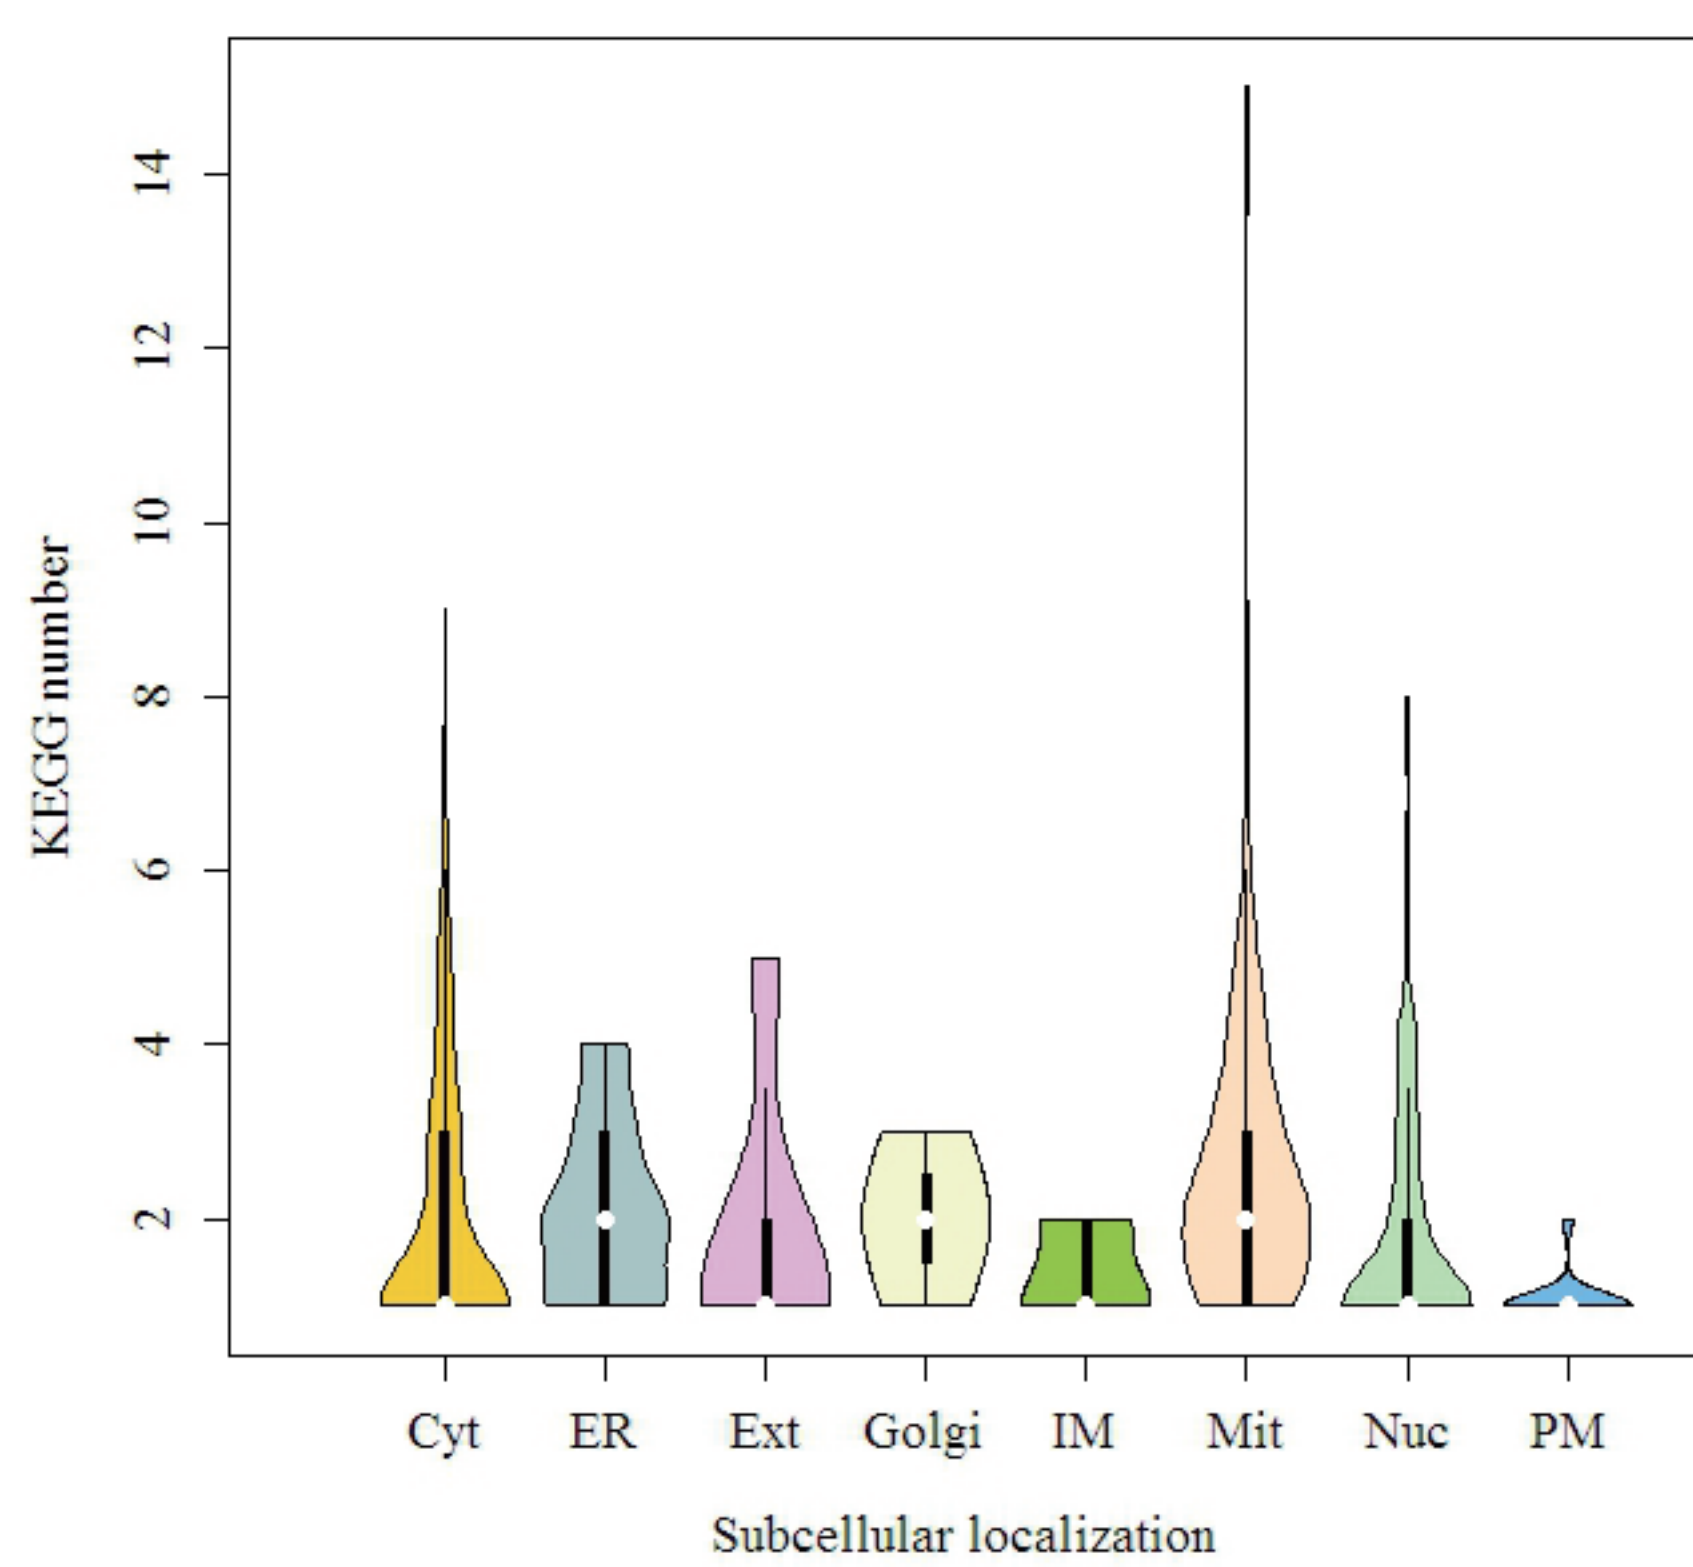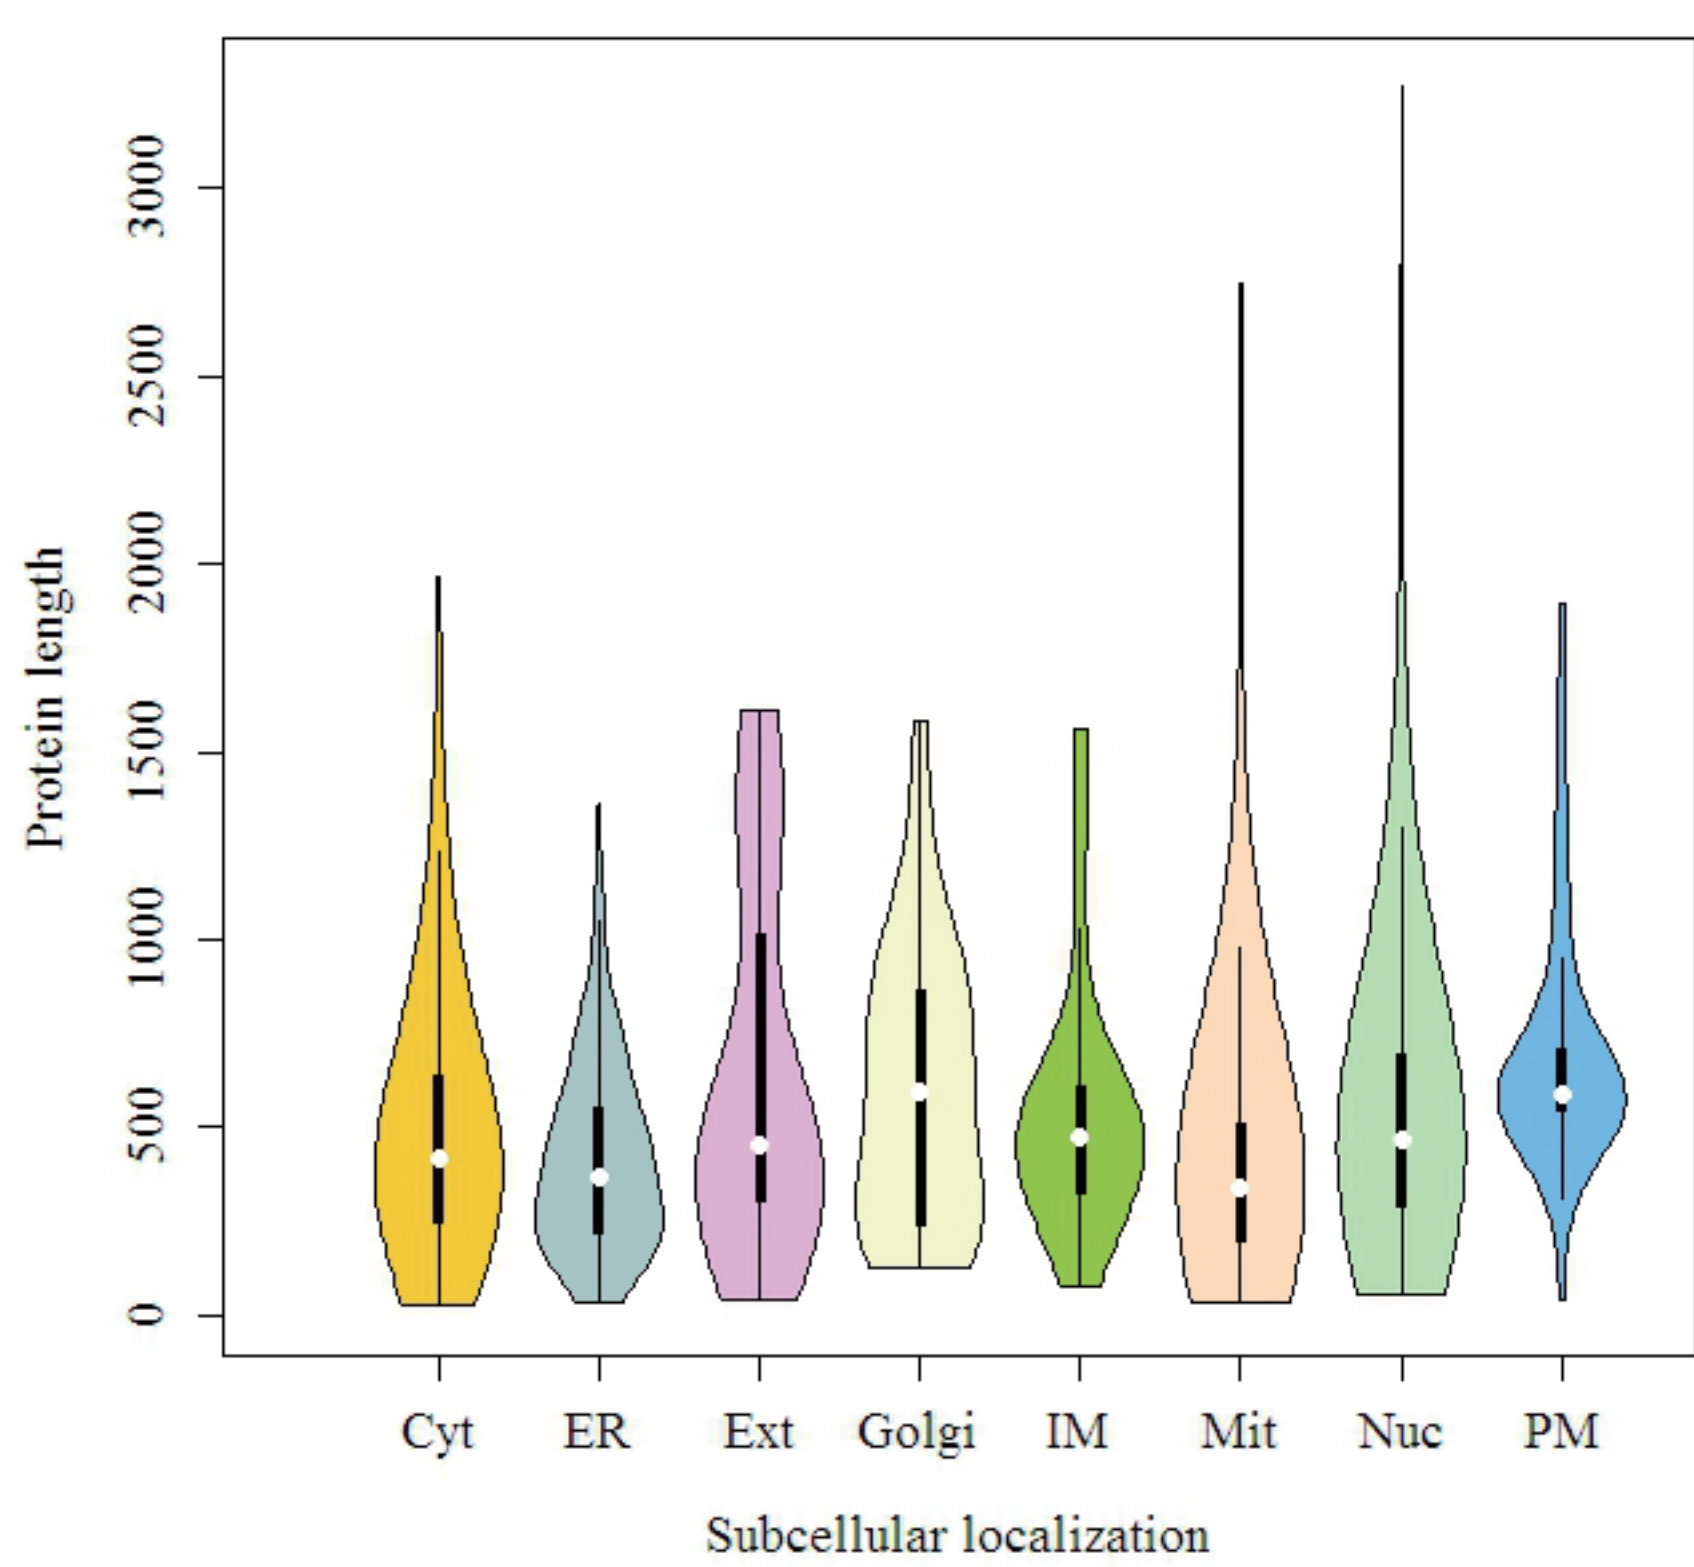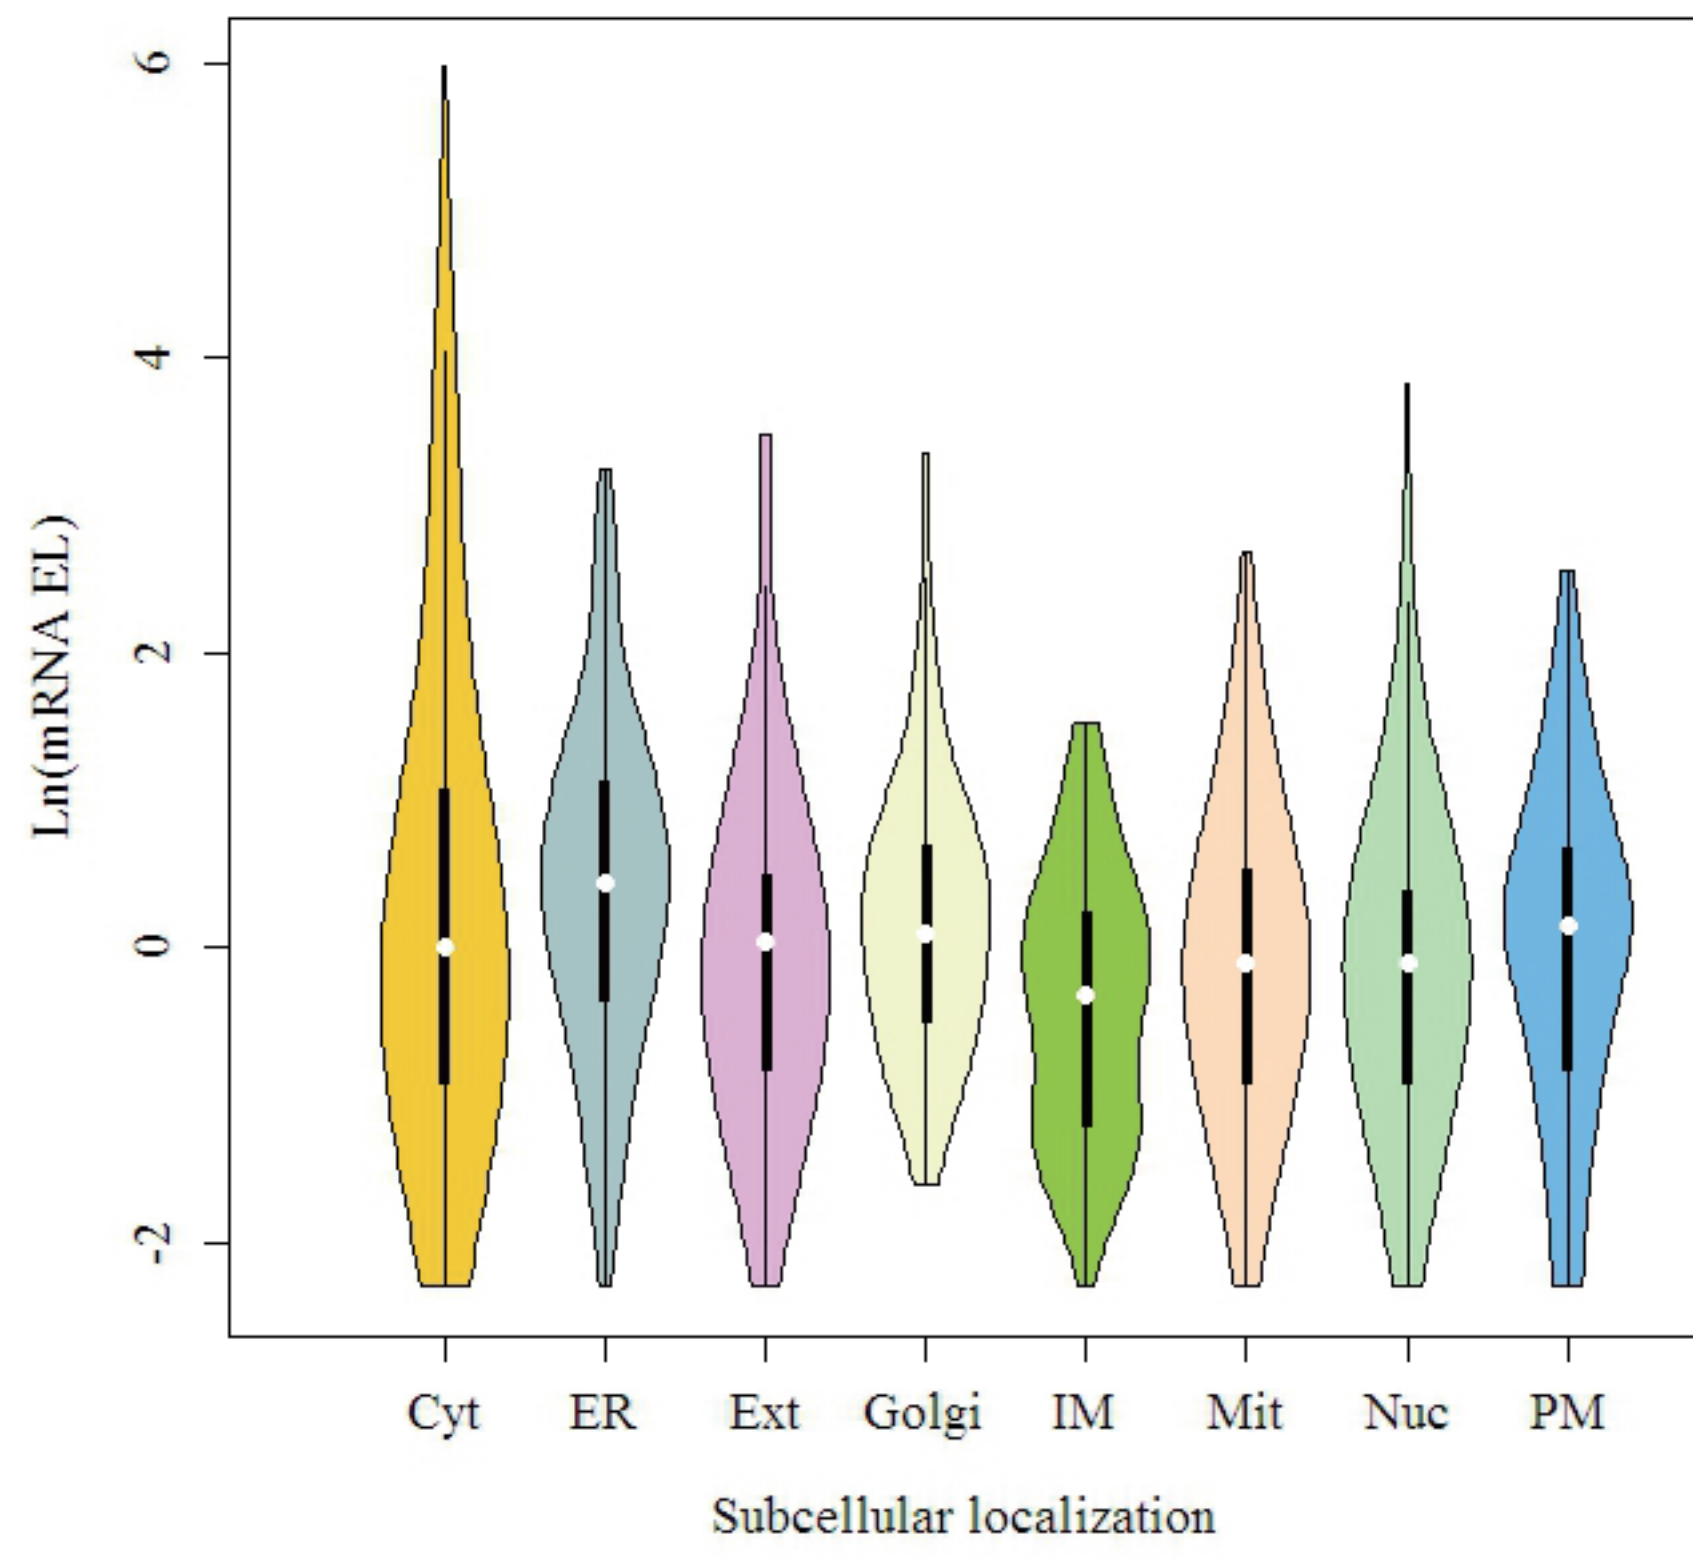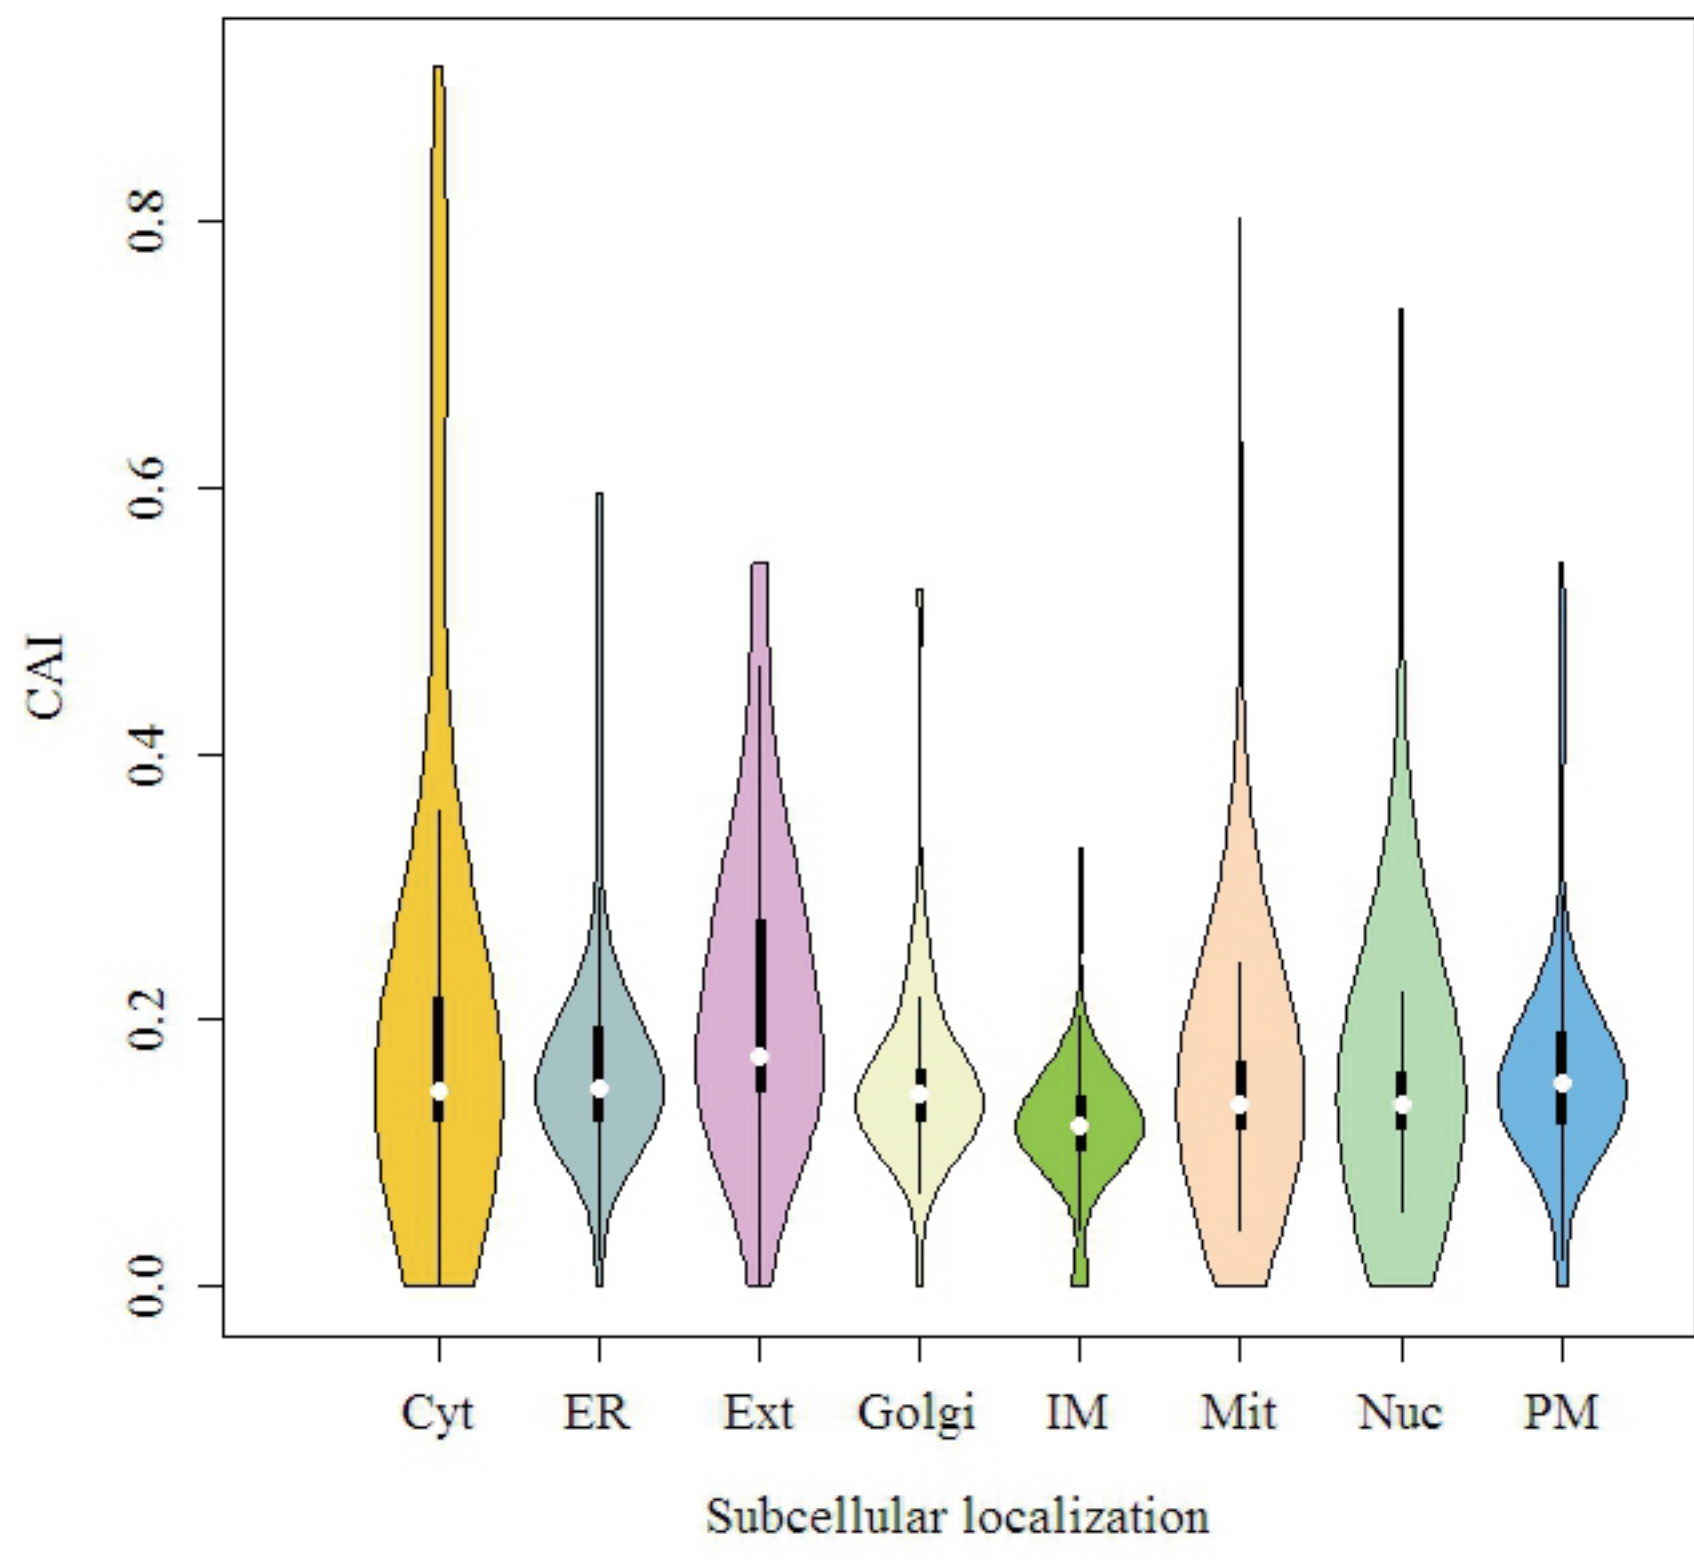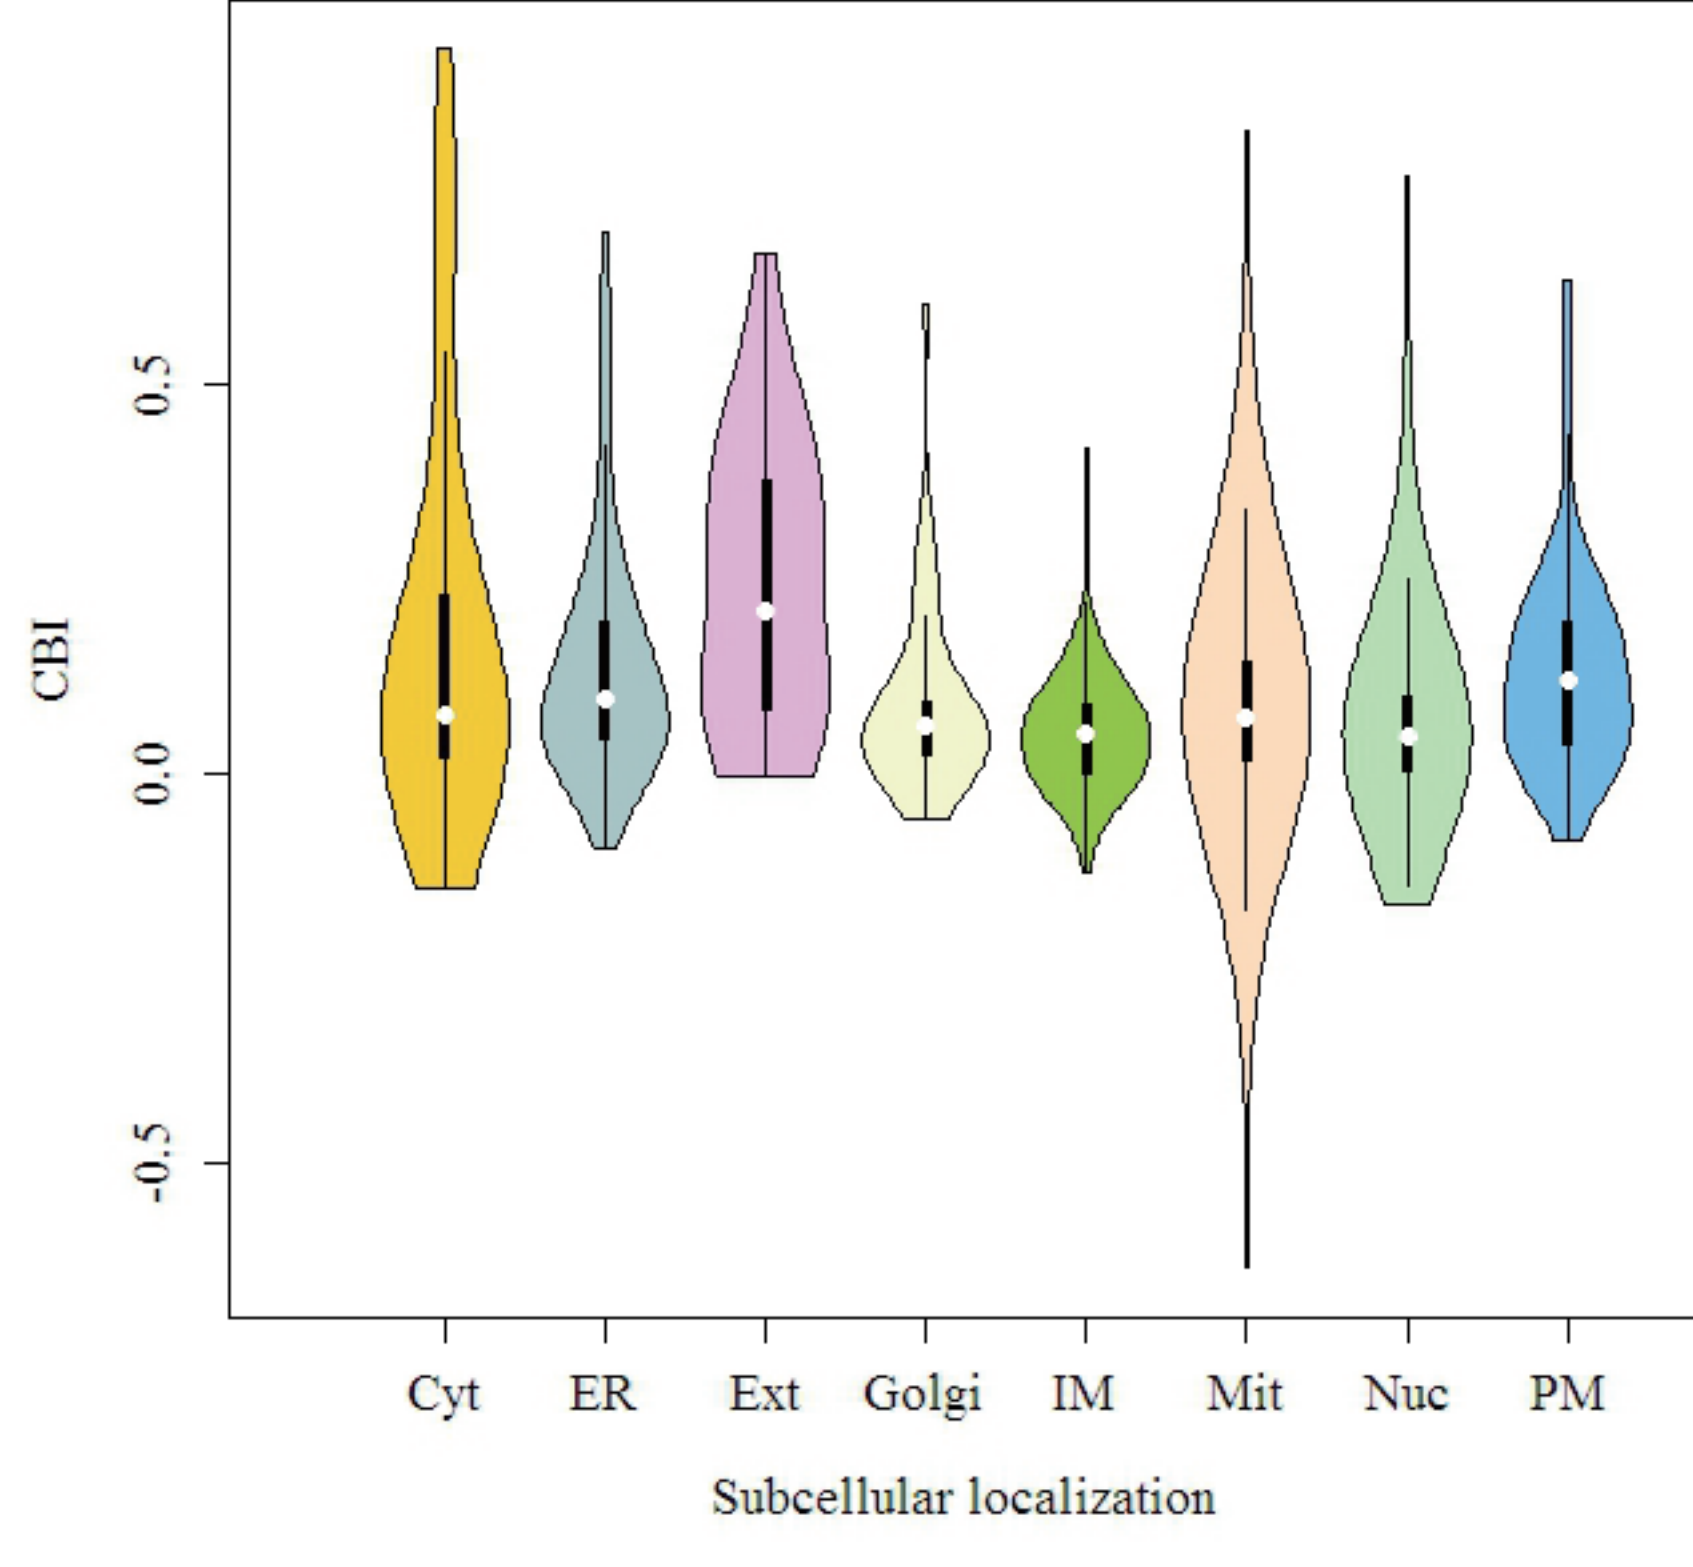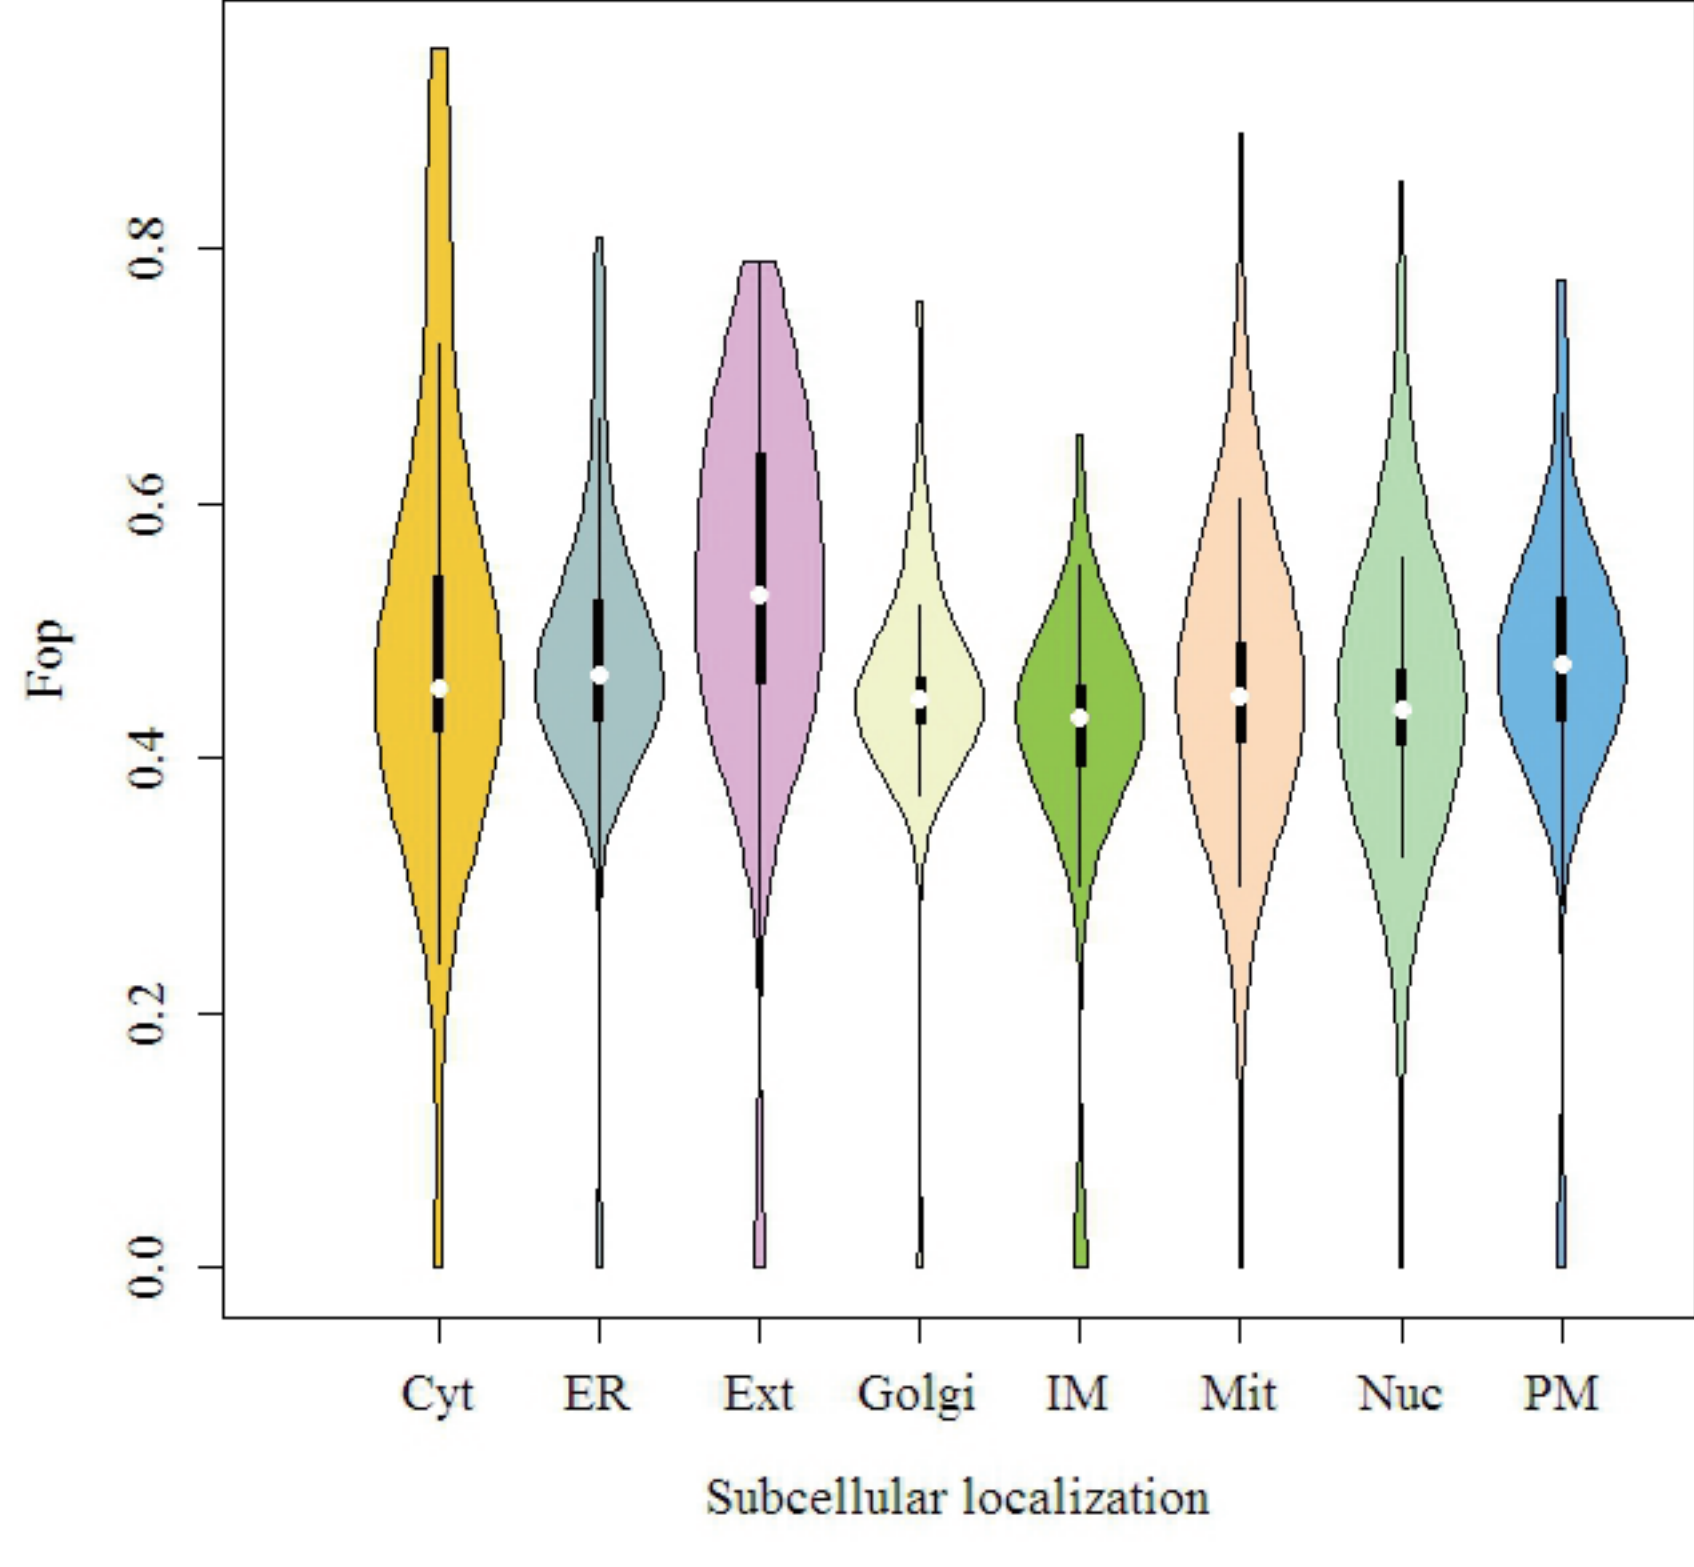

Supplement: c5mb00124b5.pdf [file c5mb00124b5.pdf]
